# Supplementary material for: Evaluation of Antiviral, Antibacterial and Antiproliferative Activities of the Endophytic Fungus Curvularia papendorfii, and Isolation of a New Polyhydroxyacid
Source: PubMed Central journal article supplement (PMC7564059; doi:10.3390/microorganisms8091353), 2020-09-04

## Supplementary materials

**Evaluation of antiviral, antibacterial and antiproliferative activities of the endophytic fungus *Curvularia papendorfii*, and isolation of a new polyhydroxyacid.**

**Afra Khiralla<sup>1,2</sup>, Rosella Spina<sup>1,\*</sup>, Mihayl Varbanov<sup>1</sup>, Stéphanie Philippot<sup>1</sup>, Pascal Lemiere<sup>1</sup>, Sophie Slezack-Deschaumes<sup>3</sup>, Philippe André<sup>4</sup>, Ietidal Mohamed<sup>5</sup>, Sakina Mohamed Yagi<sup>5</sup> and Dominique Laurain-Mattar<sup>1,\*</sup>**

<sup>1</sup> Université de Lorraine, CNRS, L2CM, F-54000 Nancy, France; aafraa21@hotmail.com (A.K), rosella.spina@univ-lorraine.fr (R.S), mihayl.varbanov@univ-lorraine.fr (M.V.), stephanie.philippot@univ-lorraine.fr (S.P.), pascal.lemiere@univ-lorraine.fr (P.L), dominique.mattar@univ-lorraine.fr (D.L.-M.)

<sup>2</sup> Botany Department, Faculty of Sciences and technologies, Shendi University, P. O. Box 142, Shendi, Sudan.; aafraa21@hotmail.com (A.K)

<sup>3</sup> Université de Lorraine, Inra, LAE, F-54000 Nancy, France.; sophie.deschaumes@univ-lorraine.fr (S.S.-D.)

<sup>4</sup> Université de Strasbourg, UMR 7021 CNRS, 67401 Illkirch, France; philippe.andre@unistra.fr (P.A.)

<sup>5</sup> Department of Botany, Faculty of Science, University of Khartoum, 11115 Khartoum, Sudan; sakinayagi@gmail.com (S.Y.), ietidalem11@gmail.com (I.M.)

\* Correspondence: rosella.spina@univ-lorraine.fr (R.S. Tel.: +33-3-7274-5226 (Orcid 0000-0003-0969-2587) and dominique.mattar@univ-lorraine.fr (D.L.-M.) Tel.: +33-3-7274-5675 (Orcid 0000-0001-7013-8505)

# Contents

**Figure S1:** Response-dose curves established from results obtained by MTT assays after MCF7, HT29 and HCT116 cells exposure of *C. papendorffii*.

**Figure S2:** Chemical structure of compound **1**

**Figure S3:** IR spectrum of compound **1**

**Figure S4:** HR-ESI-MS spectrum of compound **1**

**Figure S5:**  $^1\text{H}$ -NMR spectrum of compound **1** in  $\text{CD}_3\text{OD}$  (400 MHz)

**Figure S6:**  $^{13}\text{C}$ -NMR spectrum of compound **1** in  $\text{CD}_3\text{OD}$  (100 MHz)

**Figure S7:**  $^1\text{H}$ - $^1\text{H}$  COSY spectrum of compound **1** in  $\text{CD}_3\text{OD}$

**Figure S8:** HSQC spectrum of compound **1** in  $\text{CD}_3\text{OD}$

**Figure S9:** HMBC spectrum of compound **1** in  $\text{CD}_3\text{OD}$

**Figure S10:** Zoom of HMBC spectrum of compound **1** in  $\text{CD}_3\text{OD}$

**Figure S11:** Zoom of HMBC spectrum of compound **1** in  $\text{CD}_3\text{OD}$

**Figure S12:**  $^1\text{H}$ -NMR spectrum of compound **1** in pyridine  $d_5$  (400 MHz).

**Figure S13:**  $^{13}\text{C}$ -NMR spectrum of compound **1** in pyridine  $d_5$  (100 MHz)

**Figure S14:** Chemical structure of compound **2**

**Figure S15:** HR-ESI-MS spectrum of compound **2**

**Figure S16:**  $^1\text{H}$ -NMR spectrum of compound **2** in  $\text{DMSO } d_6$  (400 MHz).

**Figure S17:**  $^{13}\text{C}$ -NMR spectrum of compound **2** in  $\text{DMSO } d_6$  (100 MHz)

**Figure S18:**  $^1\text{H}$ - $^1\text{H}$  COSY spectrum of compound **2**

**Figure S19:** HSQC spectrum of compound **2**

**Figure S20:** HMBC spectrum of compound **2**

**Figure S1:** Response-dose curves established from results obtained by MTT assays after MCF7, HT29 and HCT116 cells exposure of *C. papendorfii*.

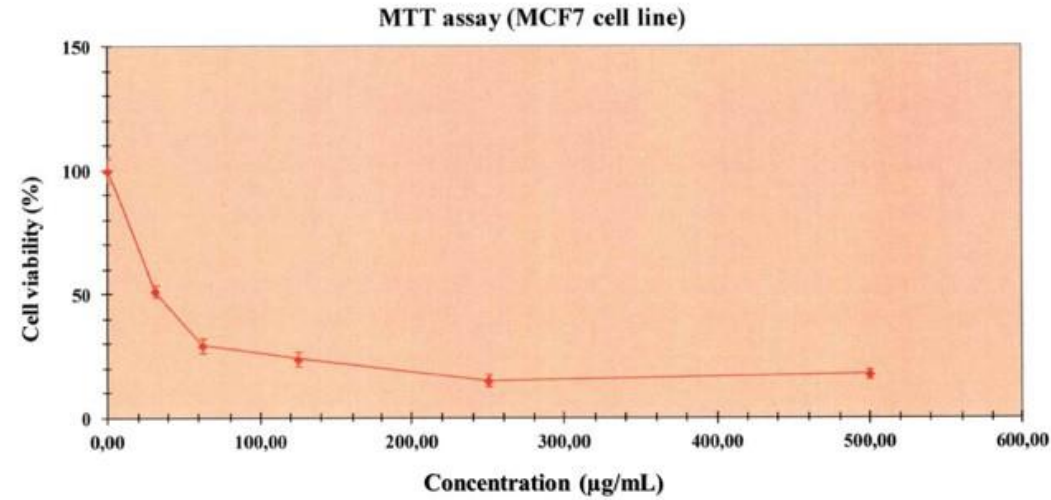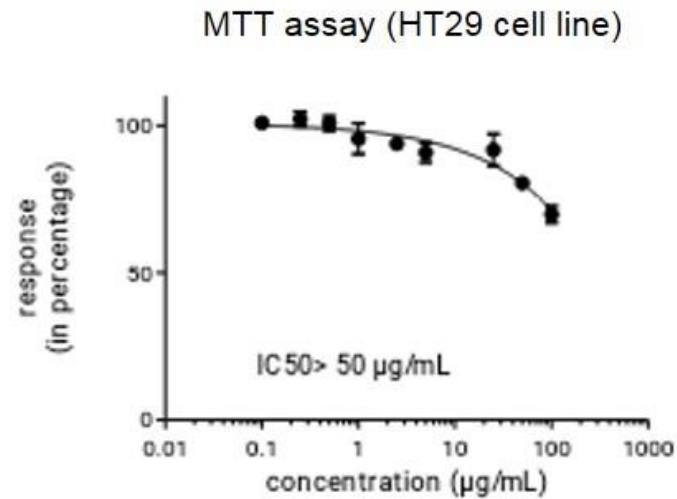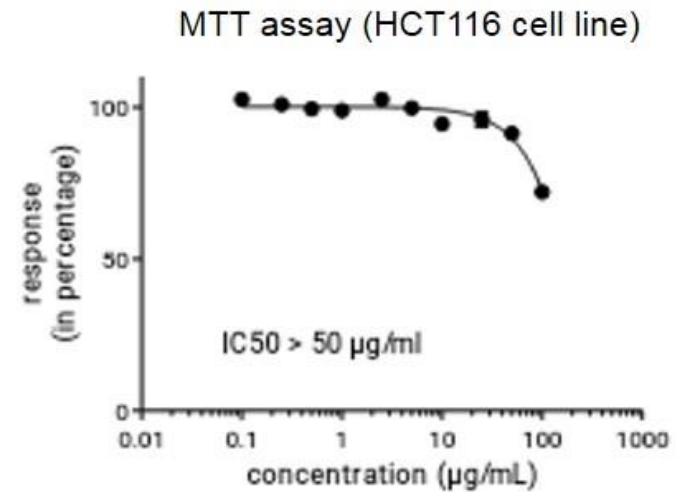

**Figure S2:** Chemical structure of compound 1

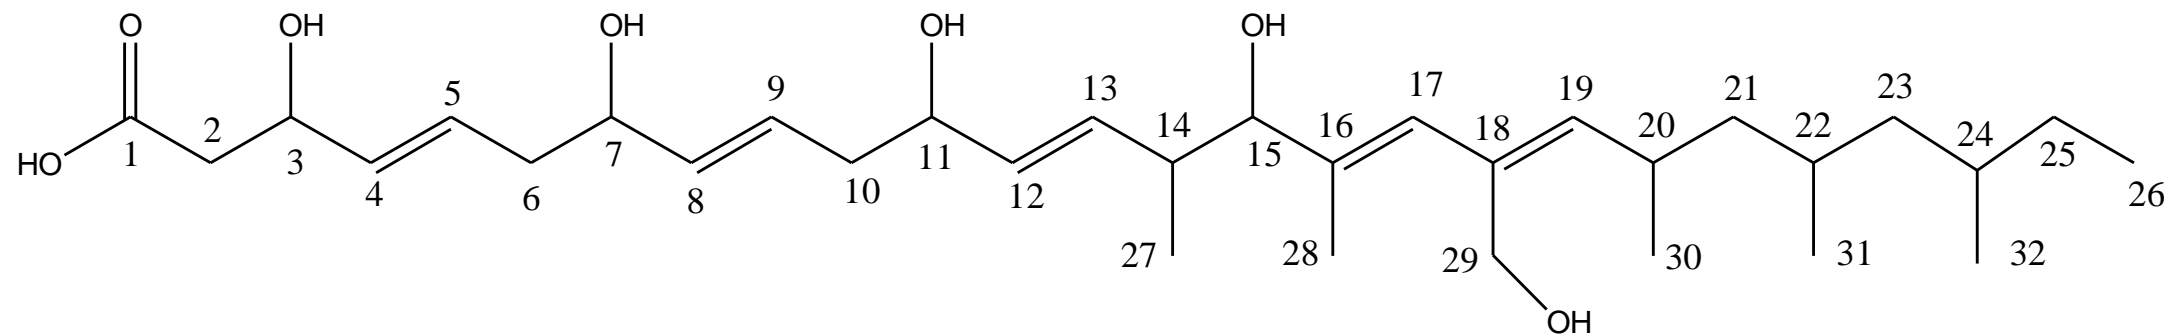

3,7,11,15-Tetrahydroxy-18-hydroxymethyl-14,16,20,22,24-pentamethyl-hexacos-4E,8E,12E,16,18-pentaenoic acid

=

kheiric acid

**Figure S3: IR spectrum of compound 1**

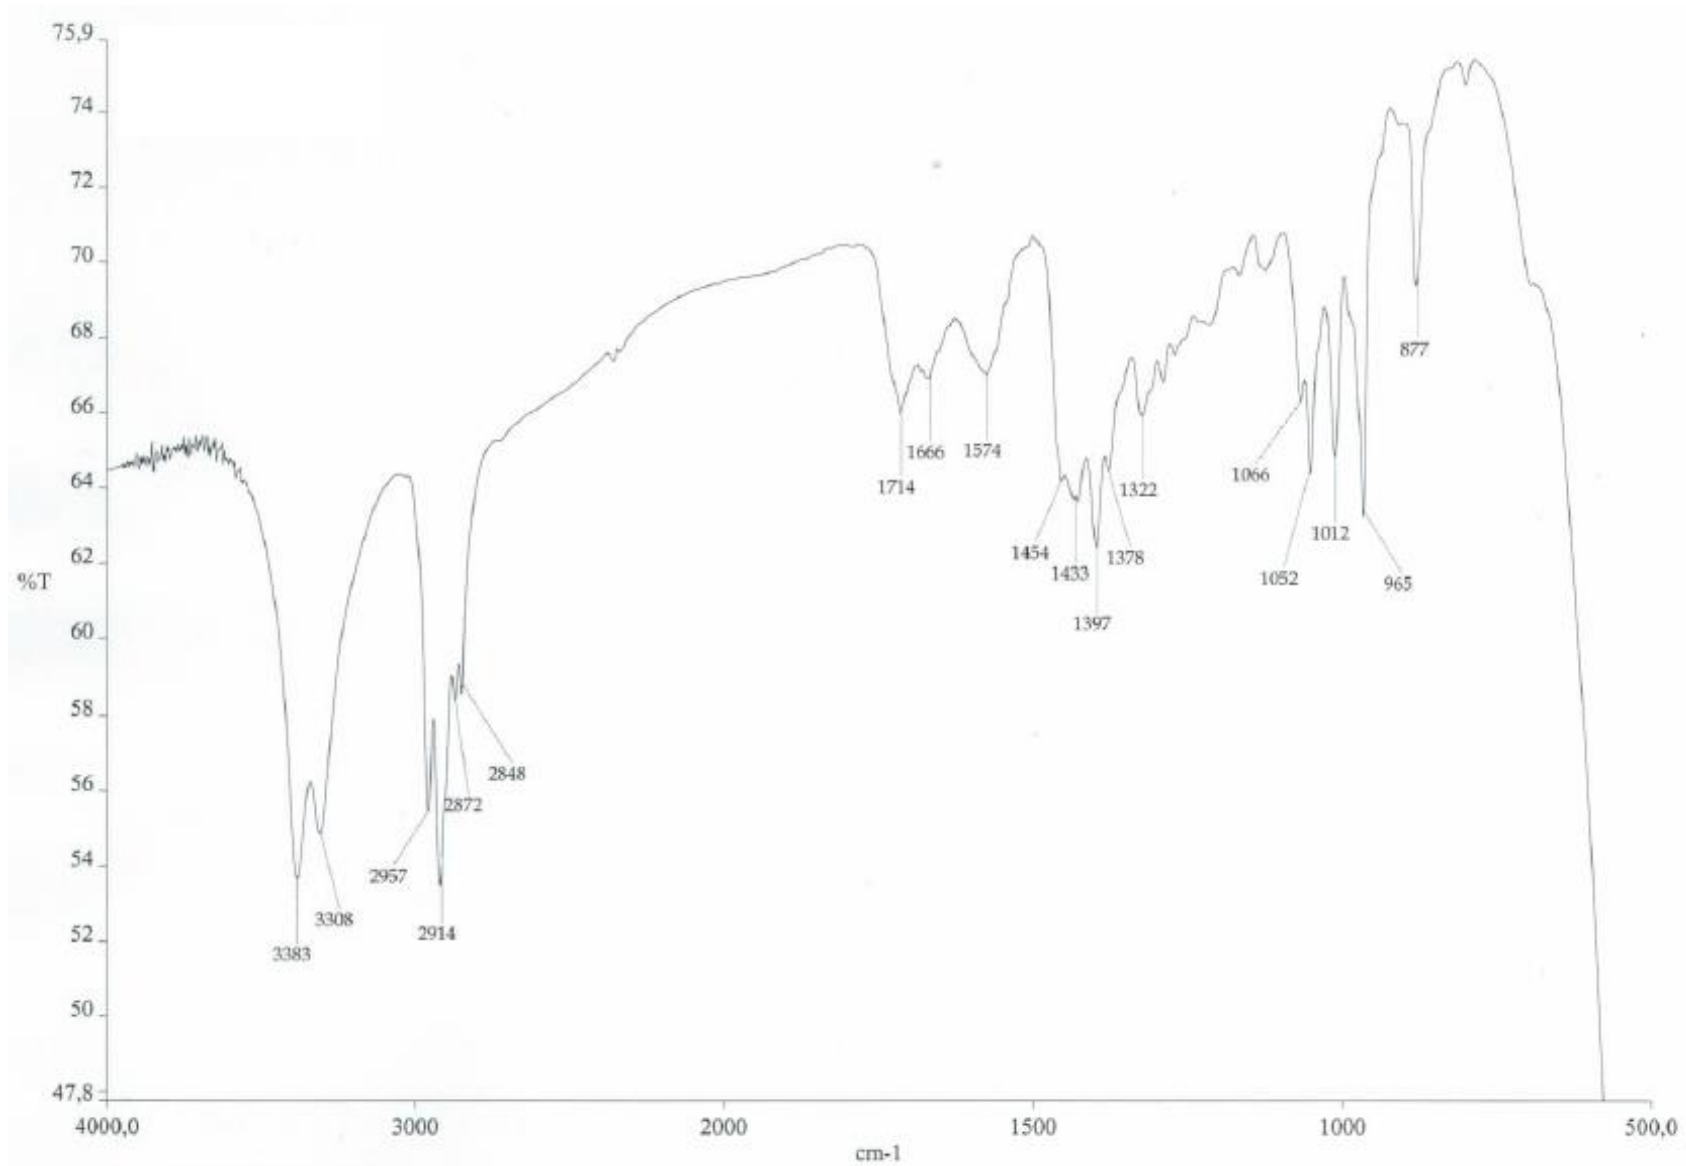

**Figure S4:** HR-ESI-MS spectrum of compound 1

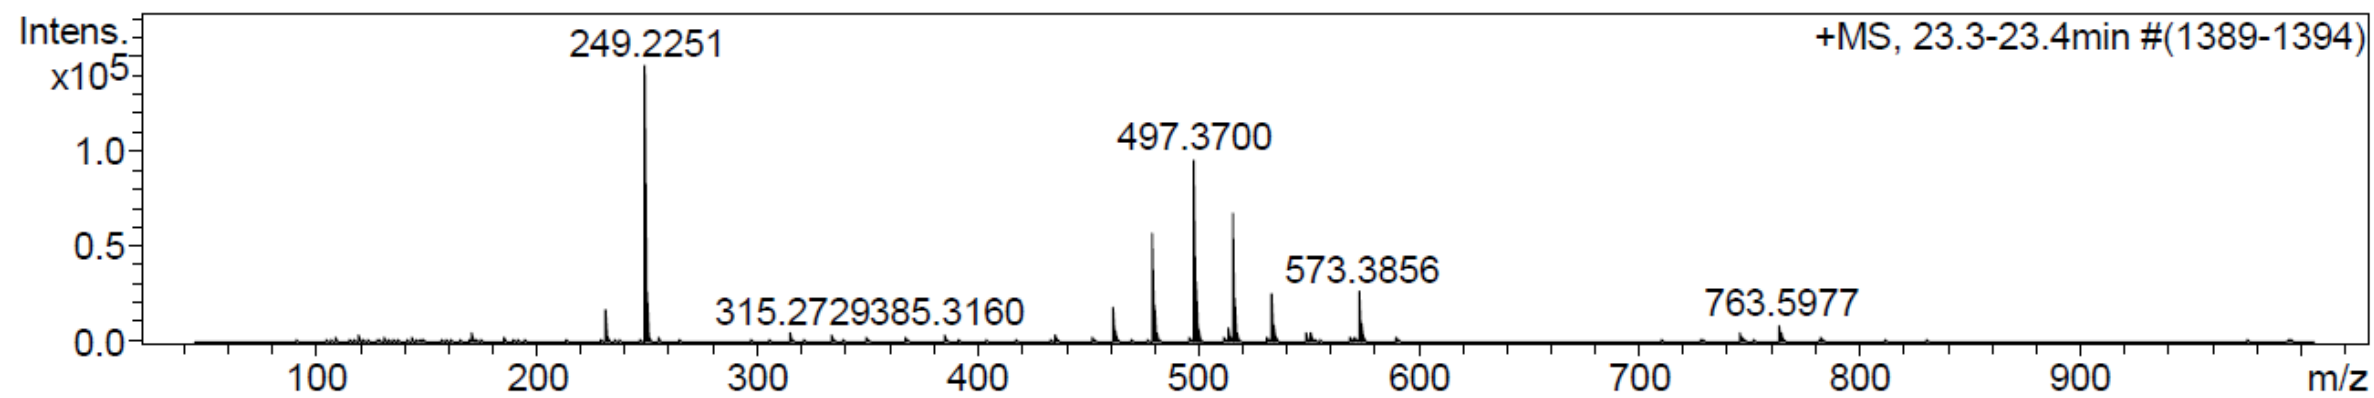

Figure S5:  $^1\text{H-NMR}$  spectrum of compound **1** in  $\text{CD}_3\text{OD}$  (400 MHz)

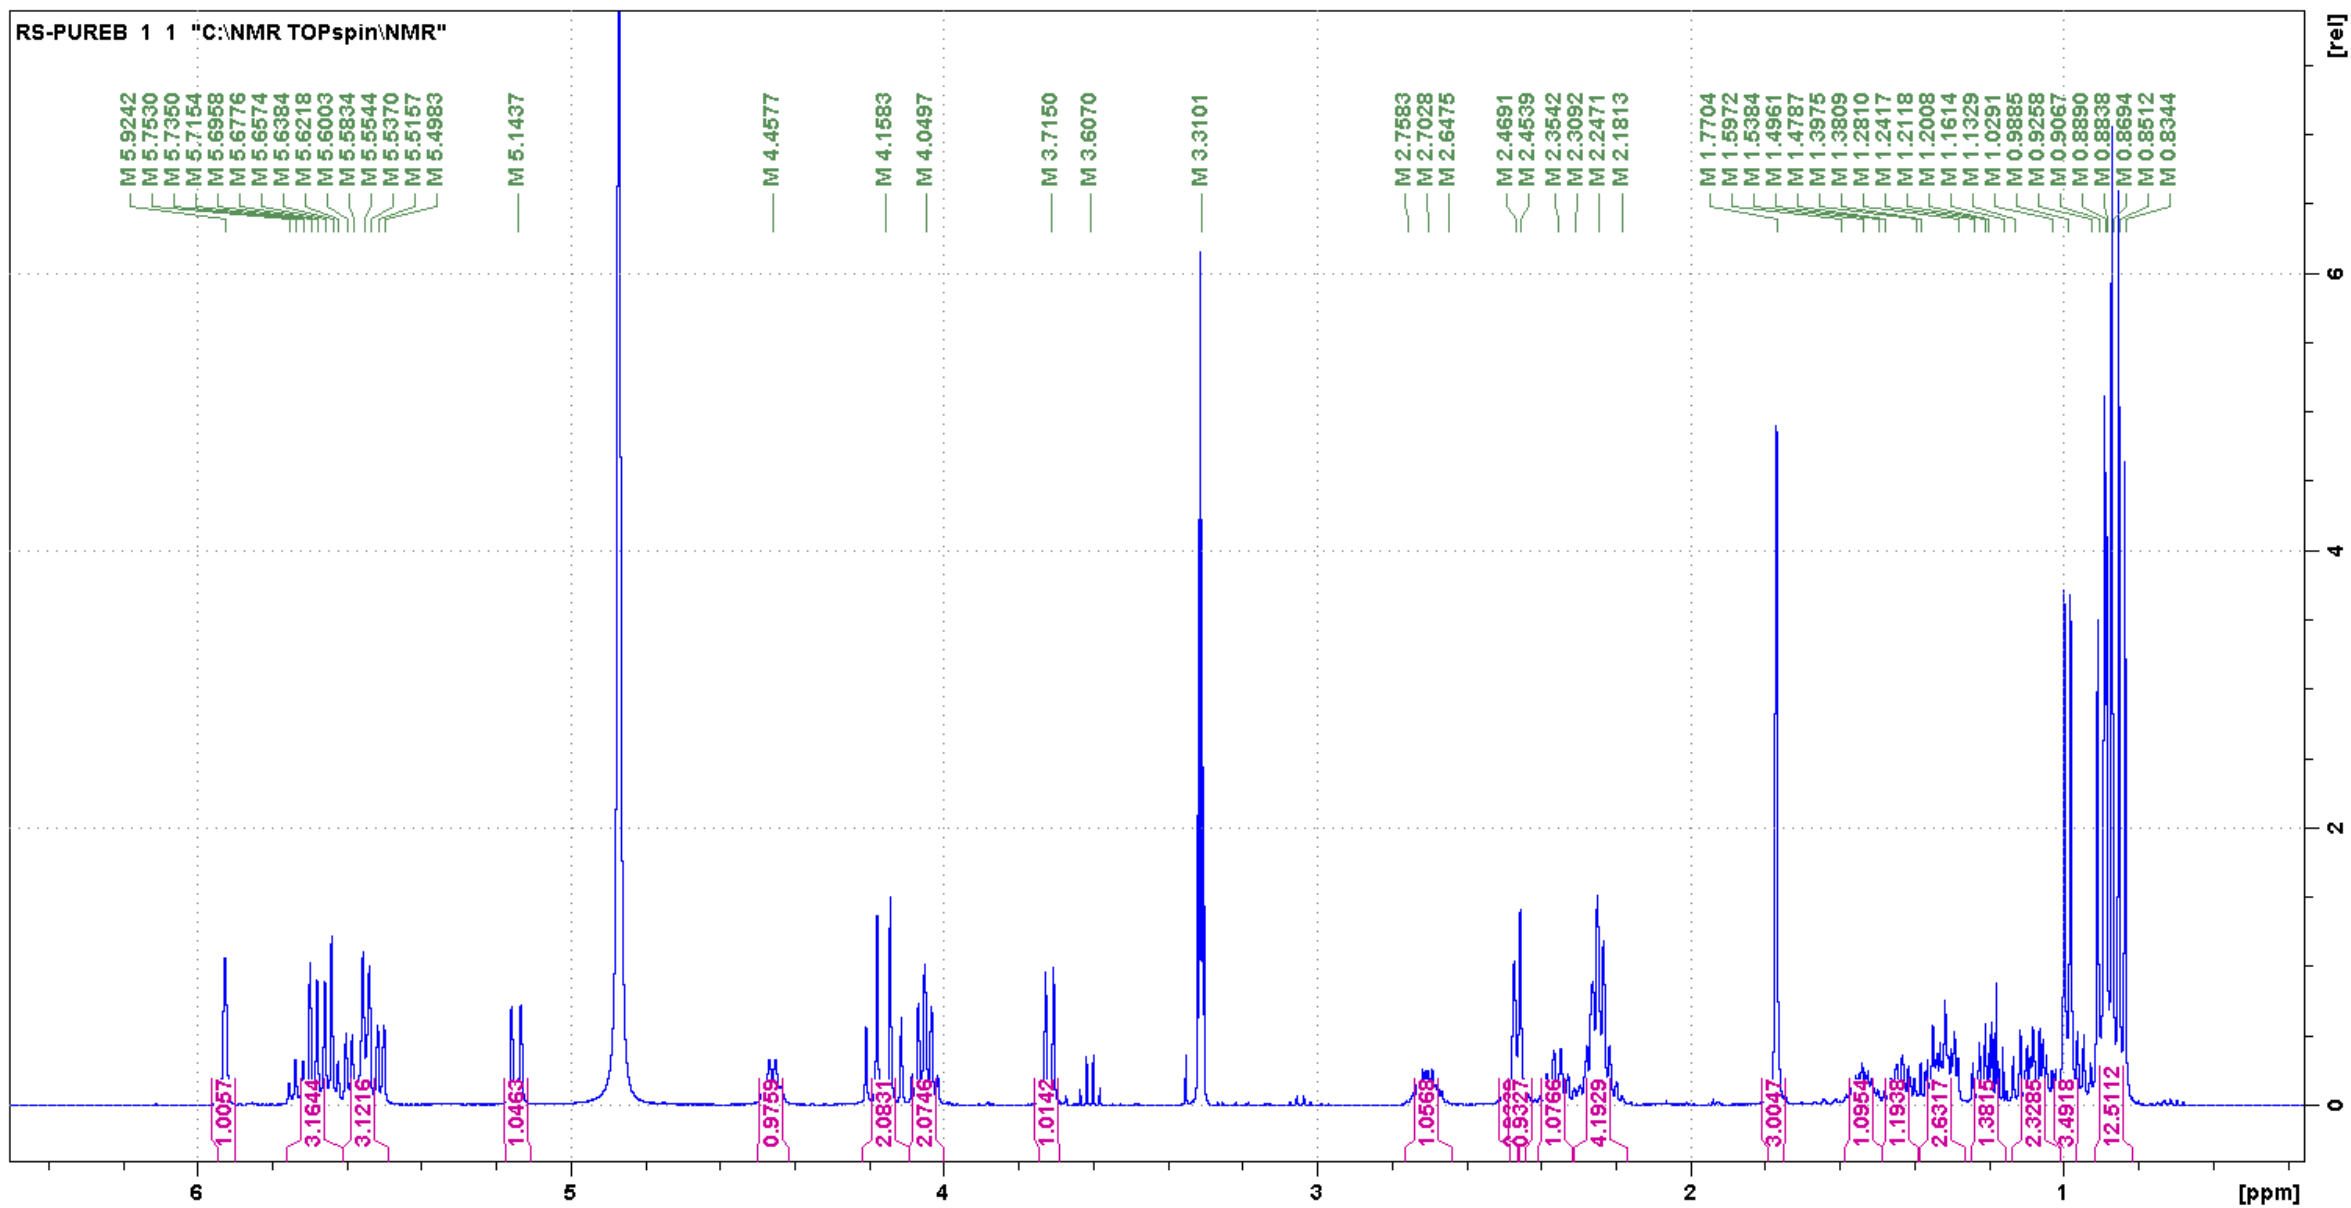

**Figure S6:**  $^{13}\text{C}$ -NMR spectrum of compound **1** in  $\text{CD}_3\text{OD}$  (100 MHz)

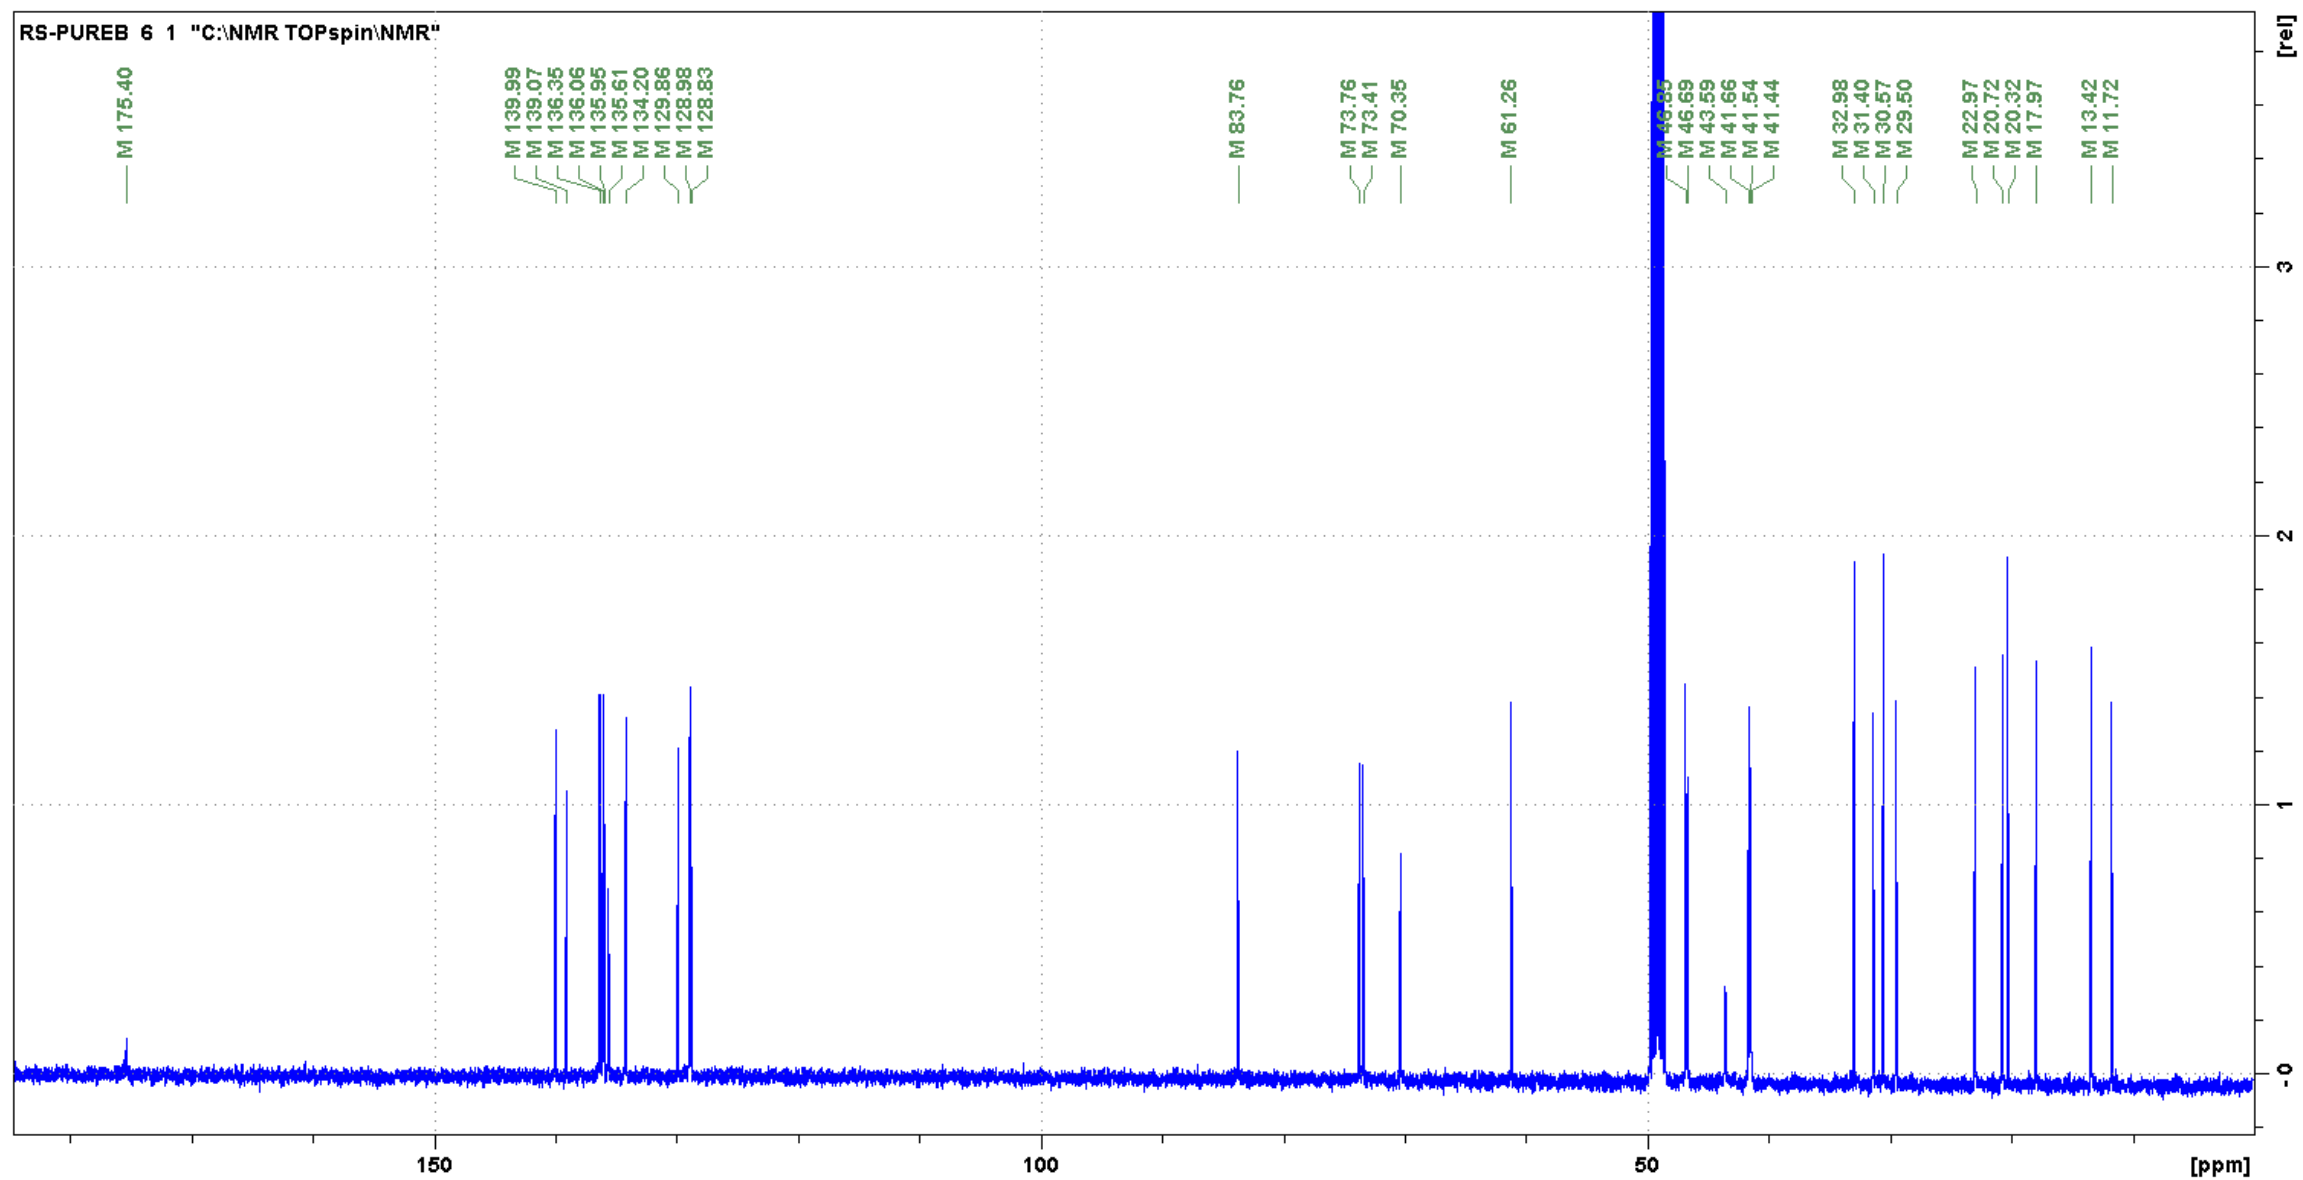



Figure S7:  $^1\text{H}$ - $^1\text{H}$  COSY spectrum of compound **1** in  $\text{CD}_3\text{OD}$

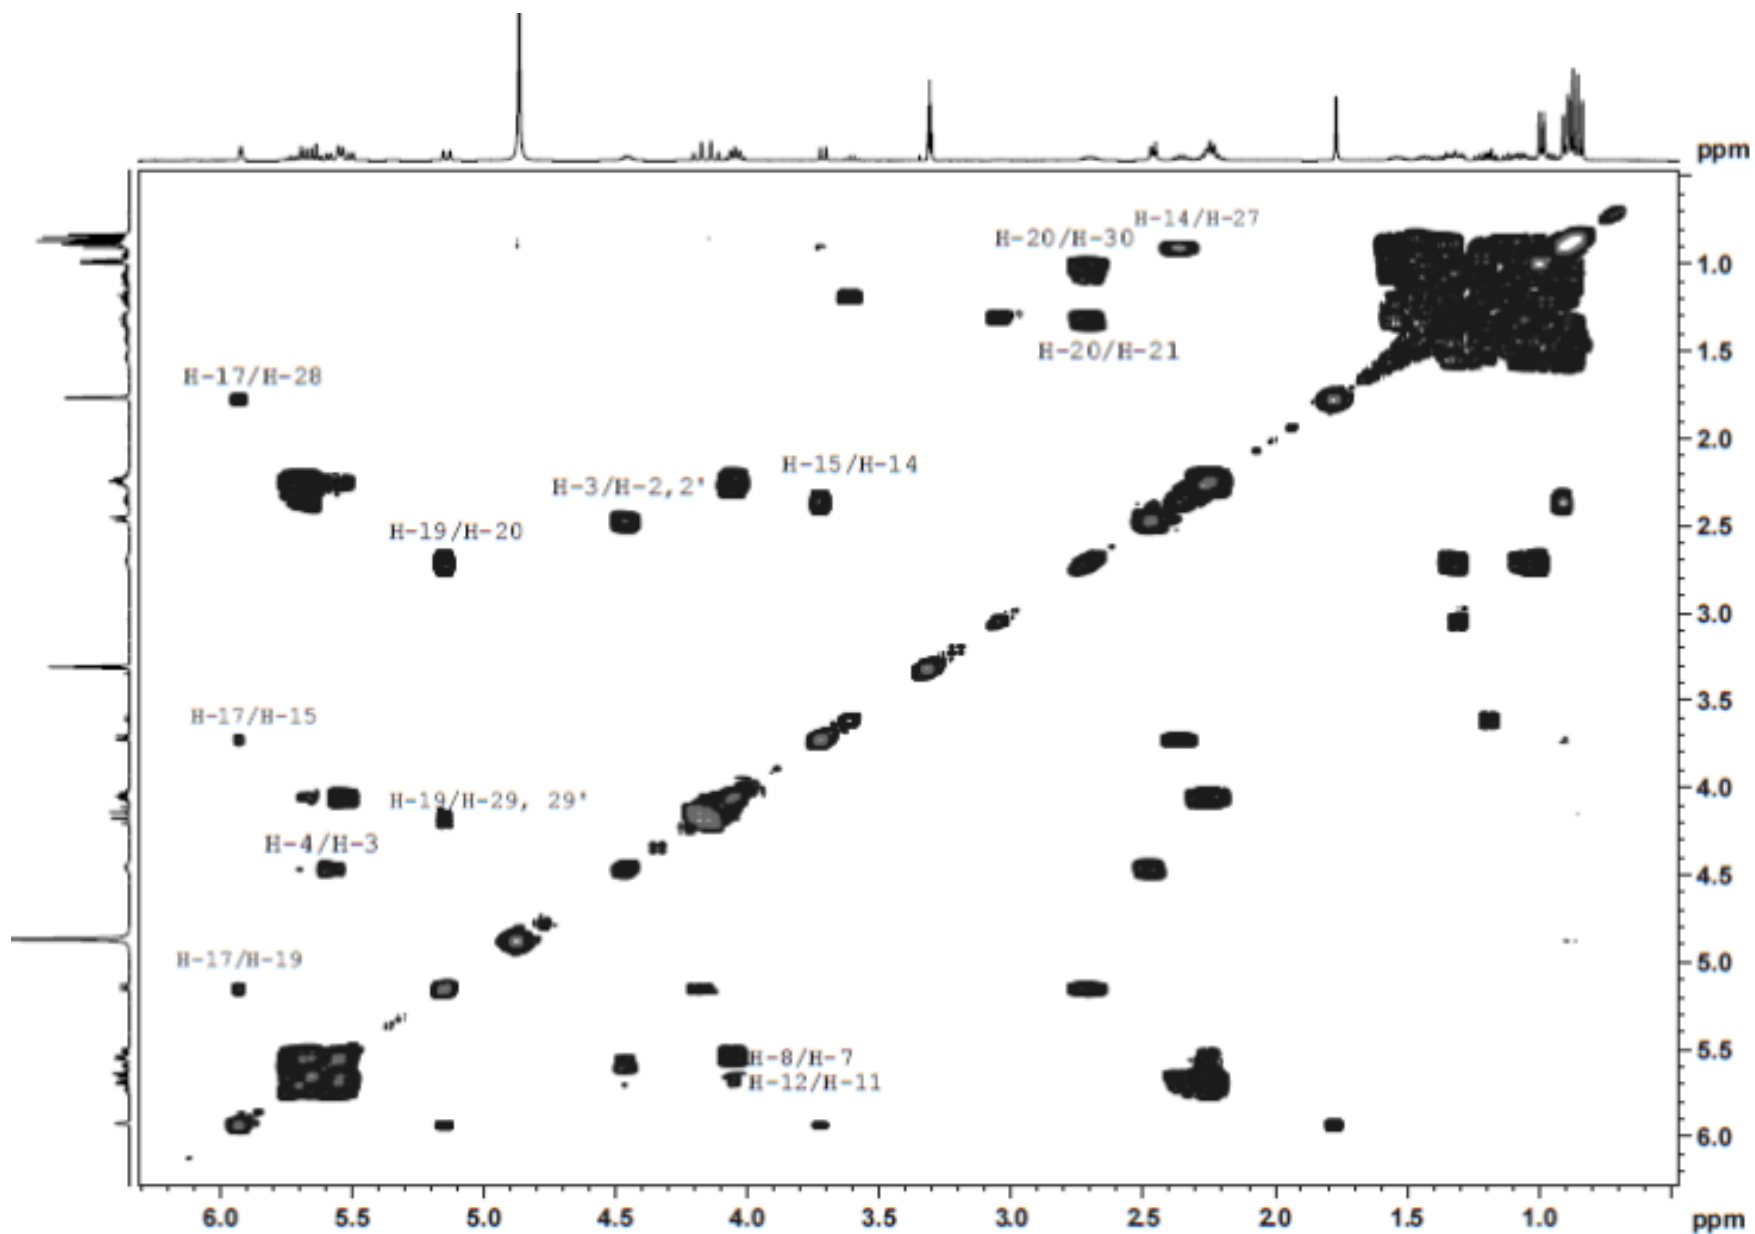

Figure S8: HSQC spectrum of compound 1 in CD<sub>3</sub>OD

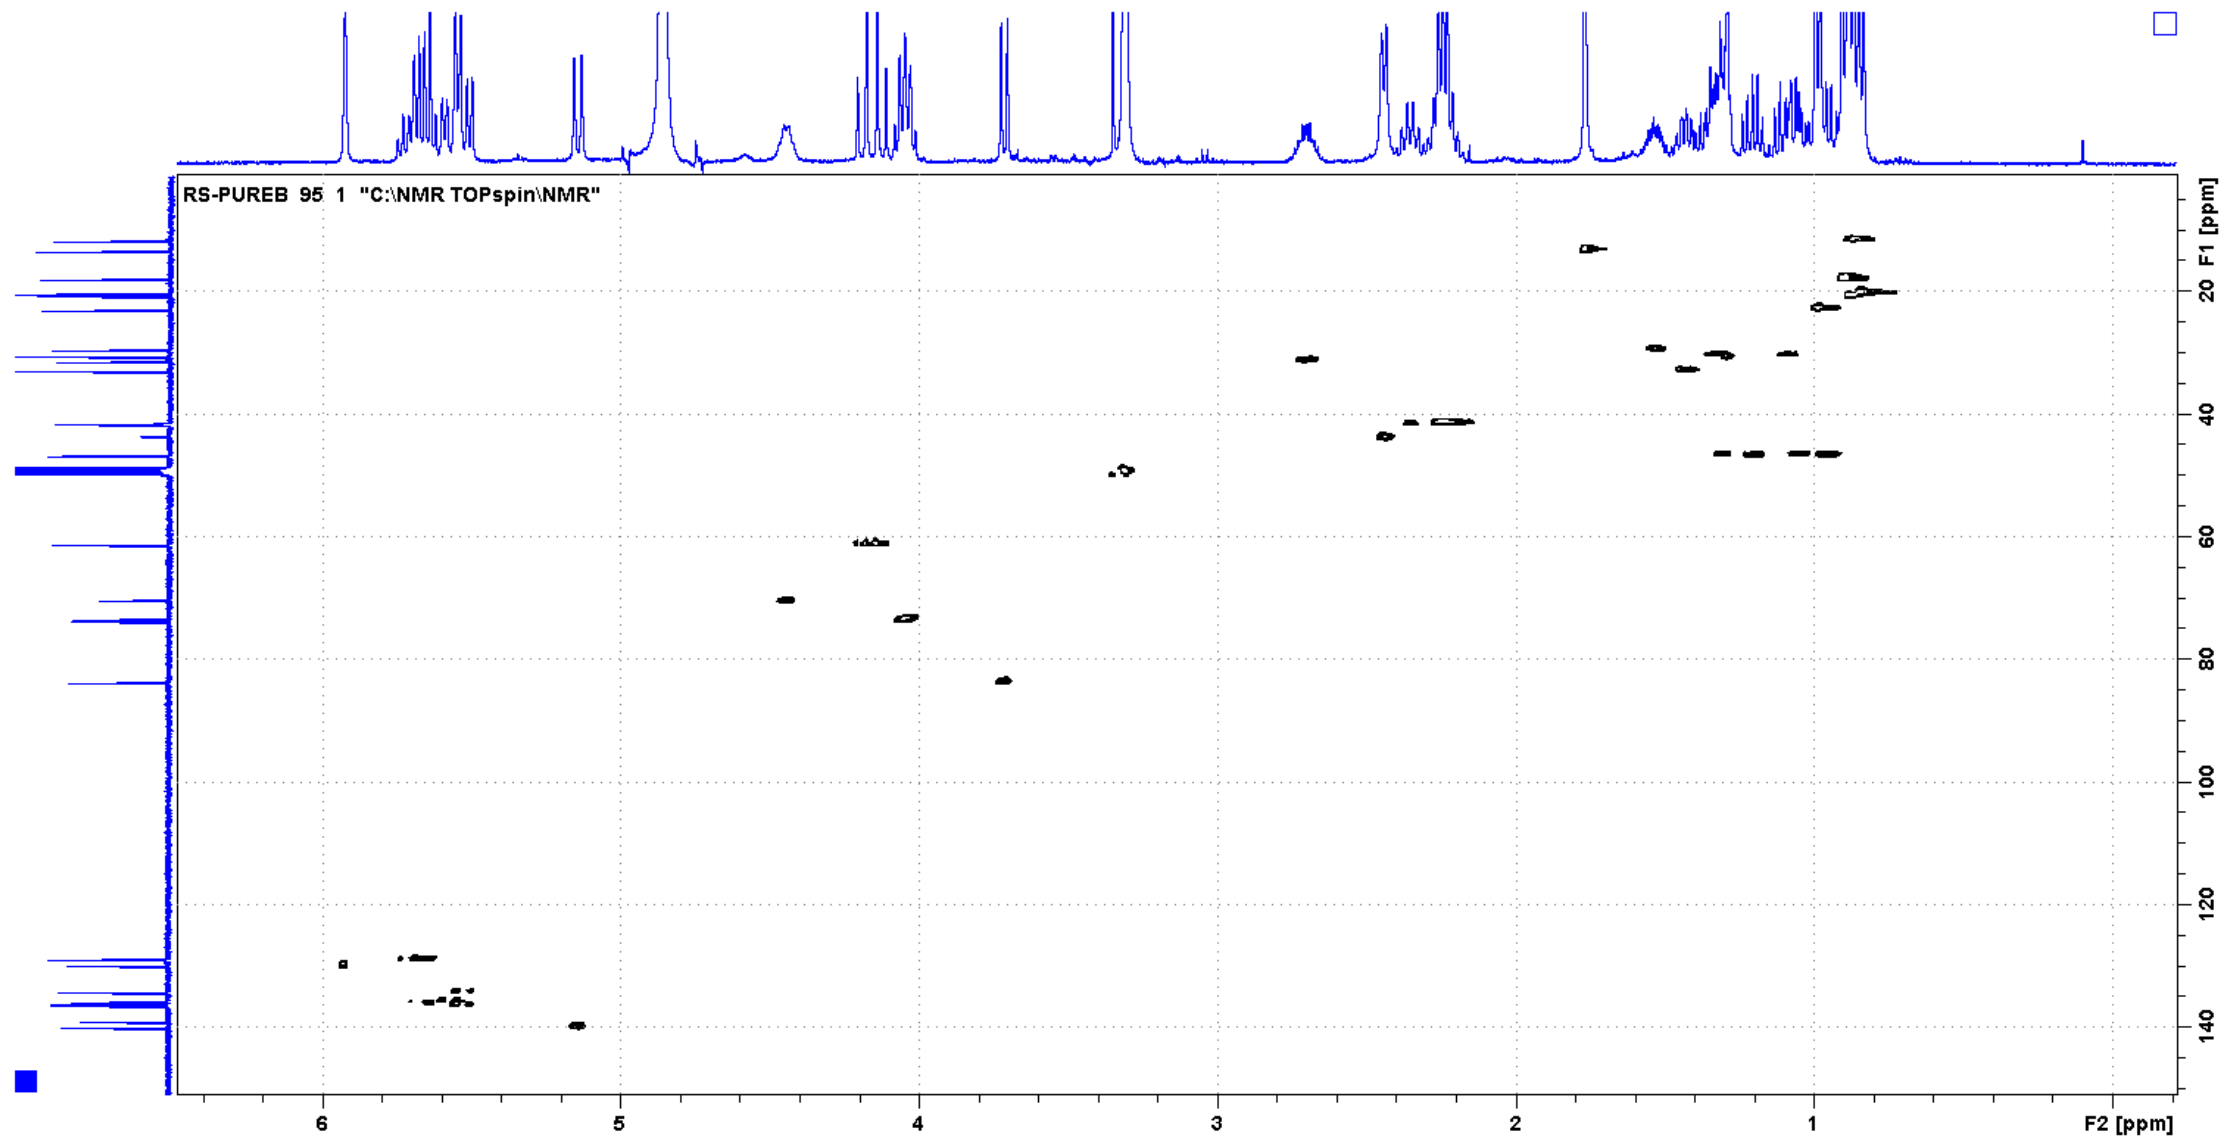

Figure S9: Zoom HSQC spectrum of compound 1 in CD<sub>3</sub>OD

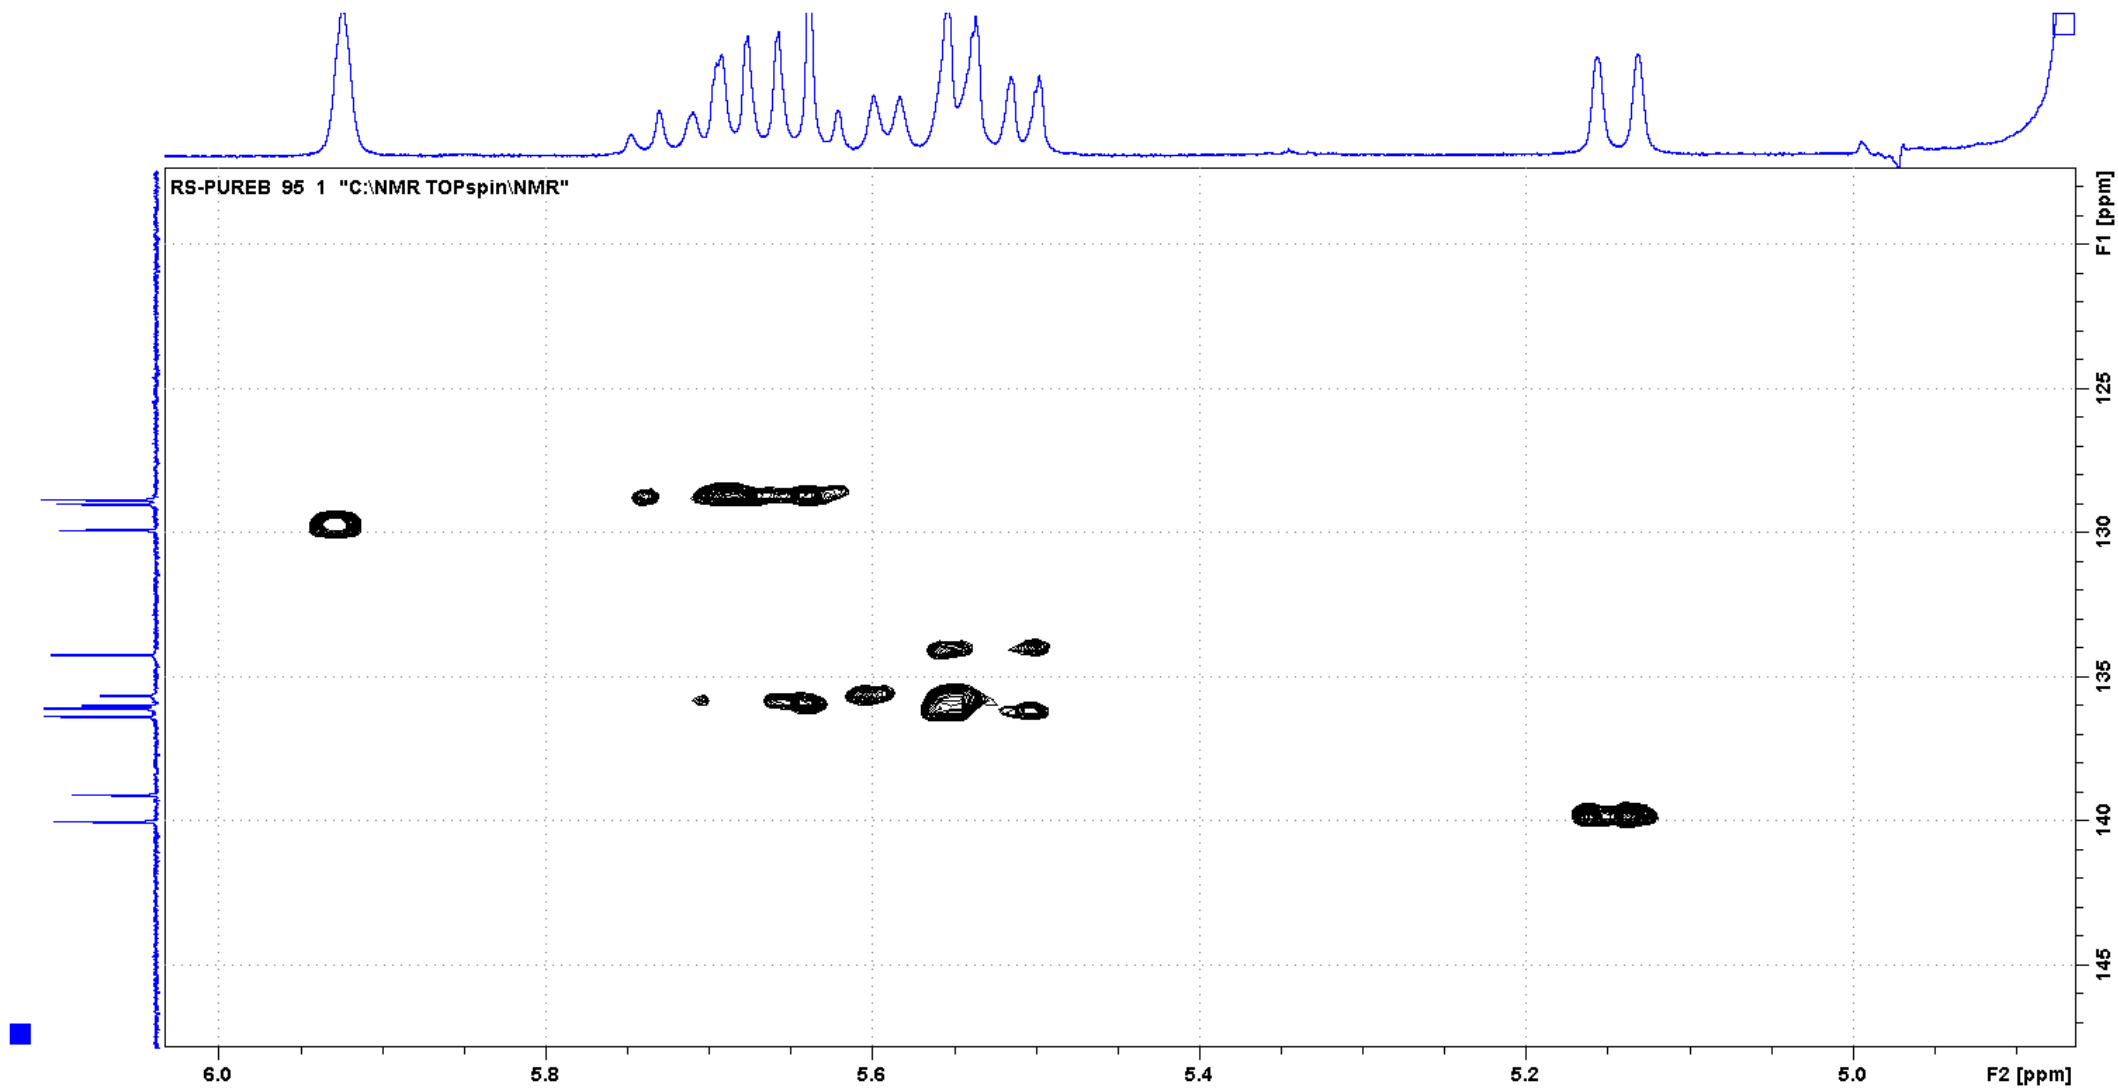

**Figure S10:** HMBC spectrum of compound **1** in CD<sub>3</sub>OD

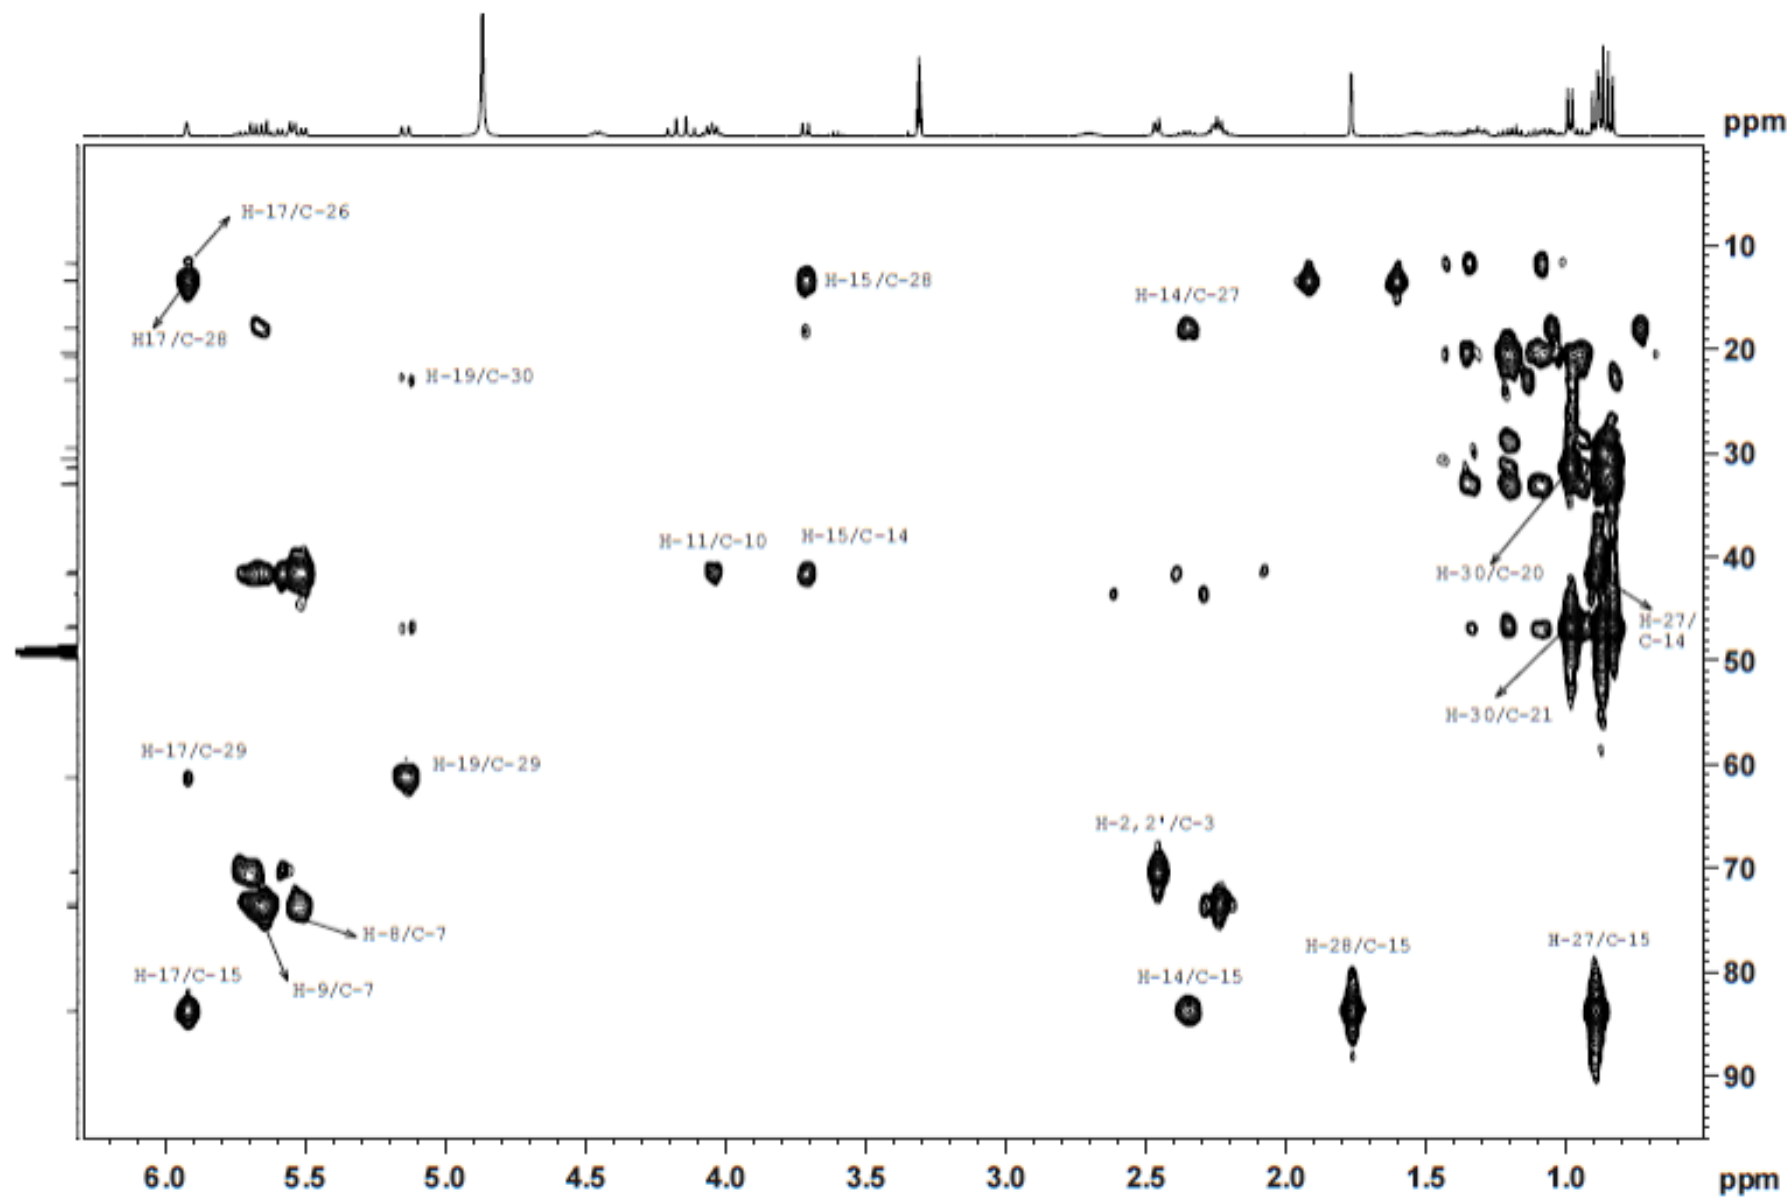

Figure S11: Zoom of HMBC spectrum of compound 1 in CD<sub>3</sub>OD

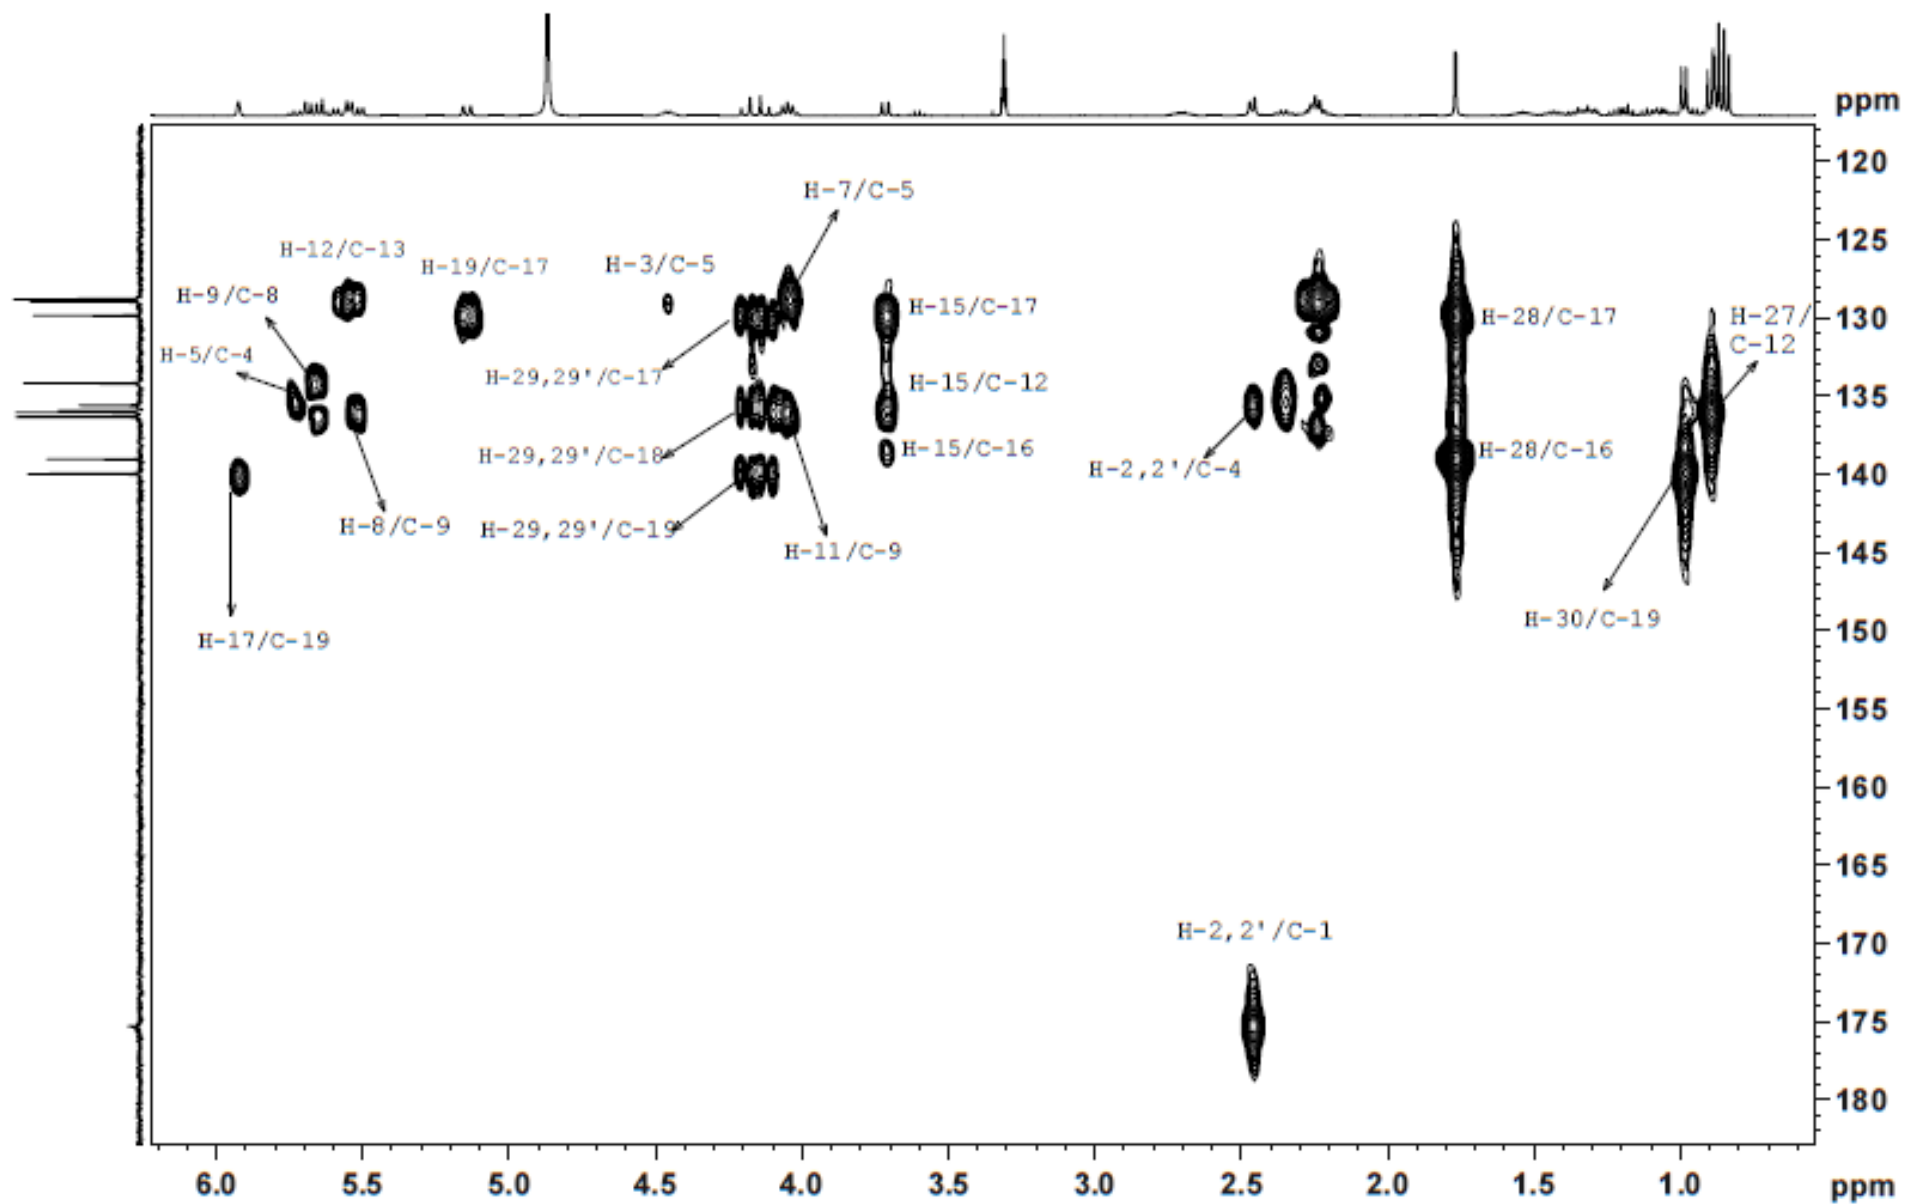

**Figure S12:**  $^1\text{H-NMR}$  spectrum of compound **1** in pyridine  $d_5$  (400 MHz)

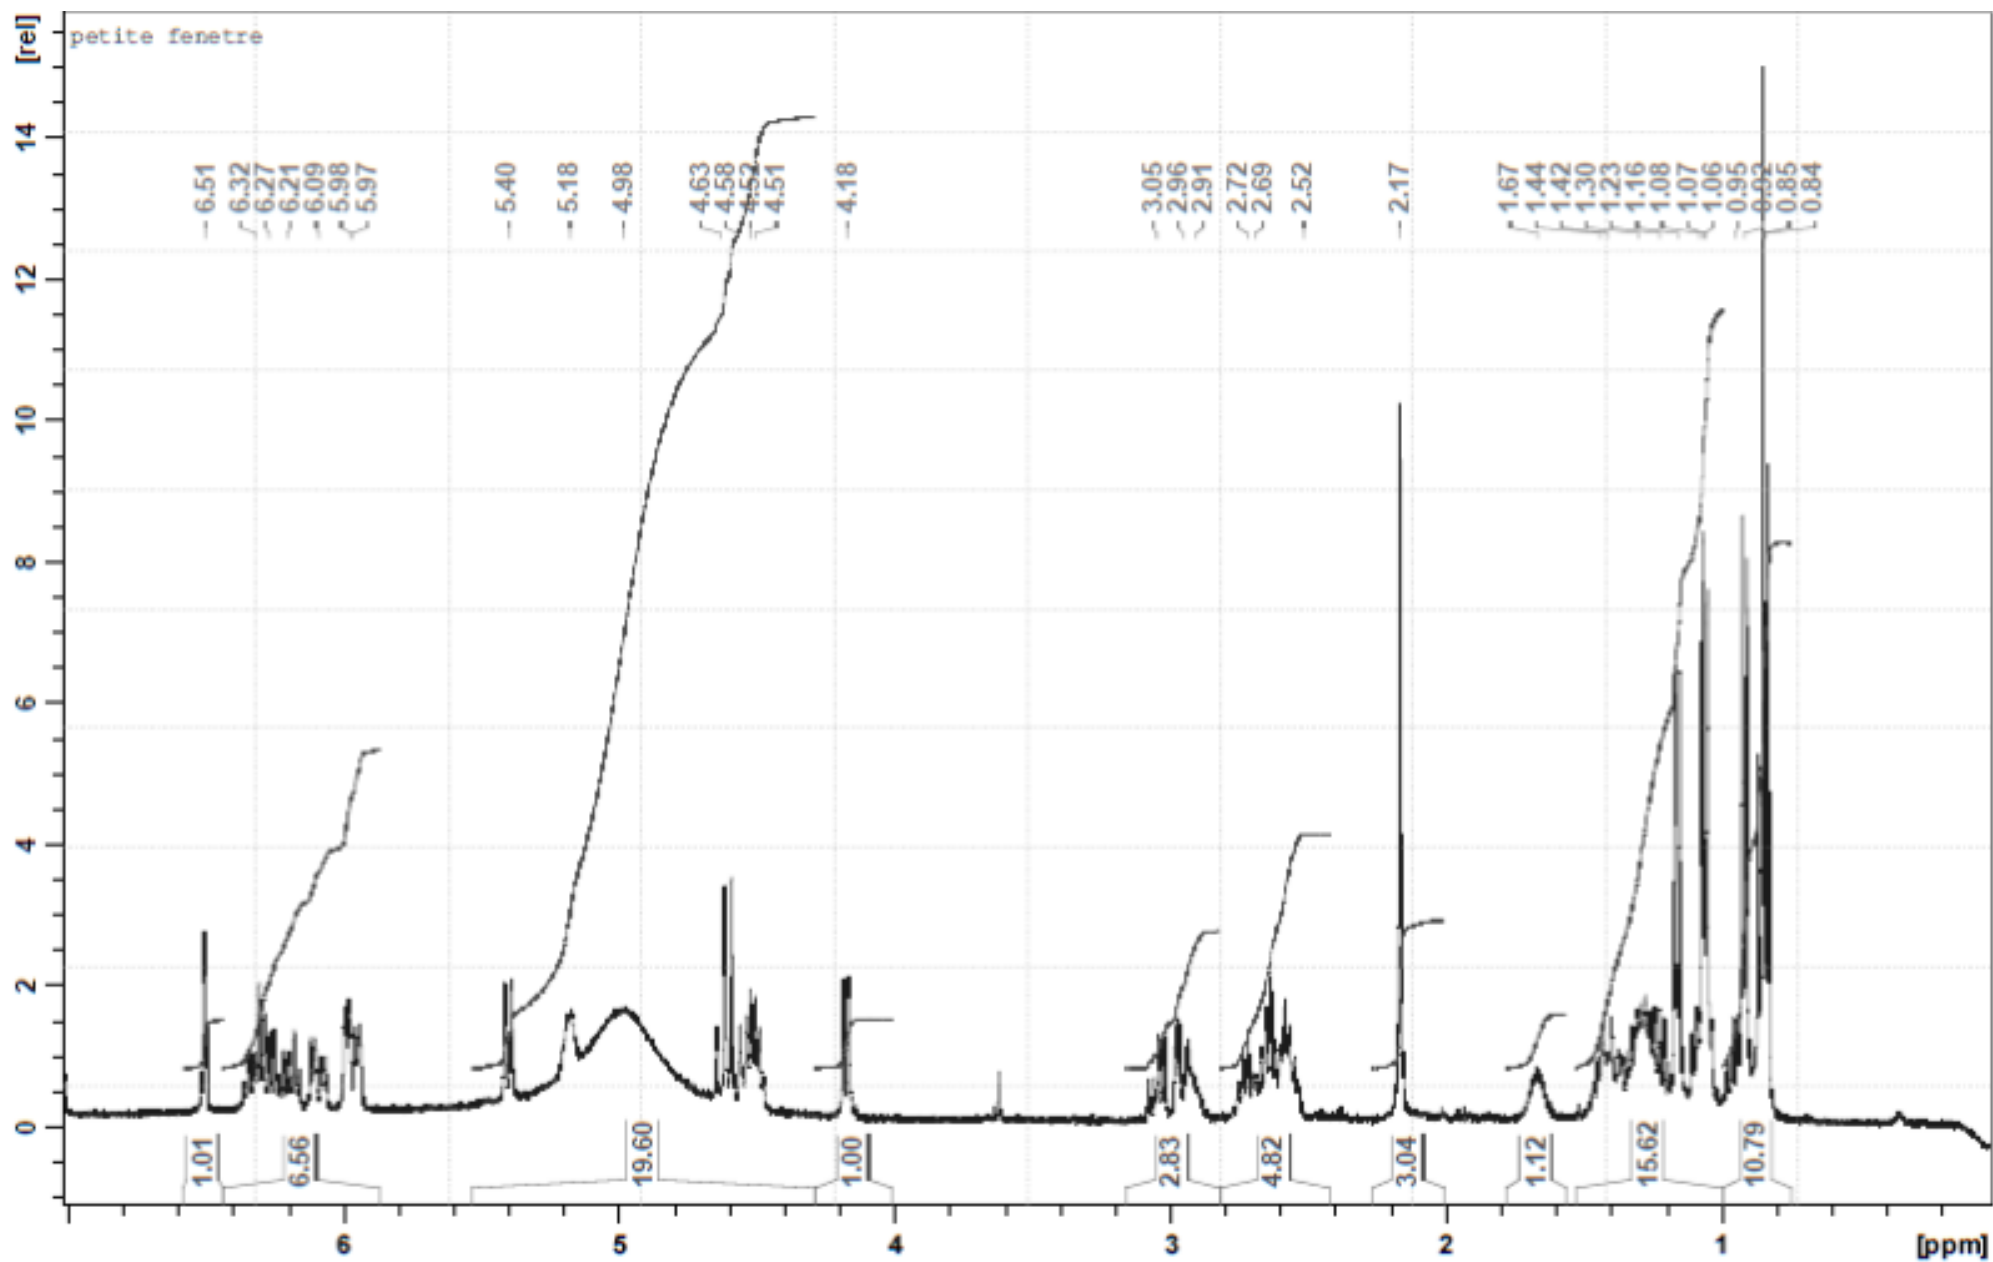

**Figure S13:**  $^{13}\text{C}$ -NMR spectrum of compound **1** in pyridine  $d_5$  (100 MHz)

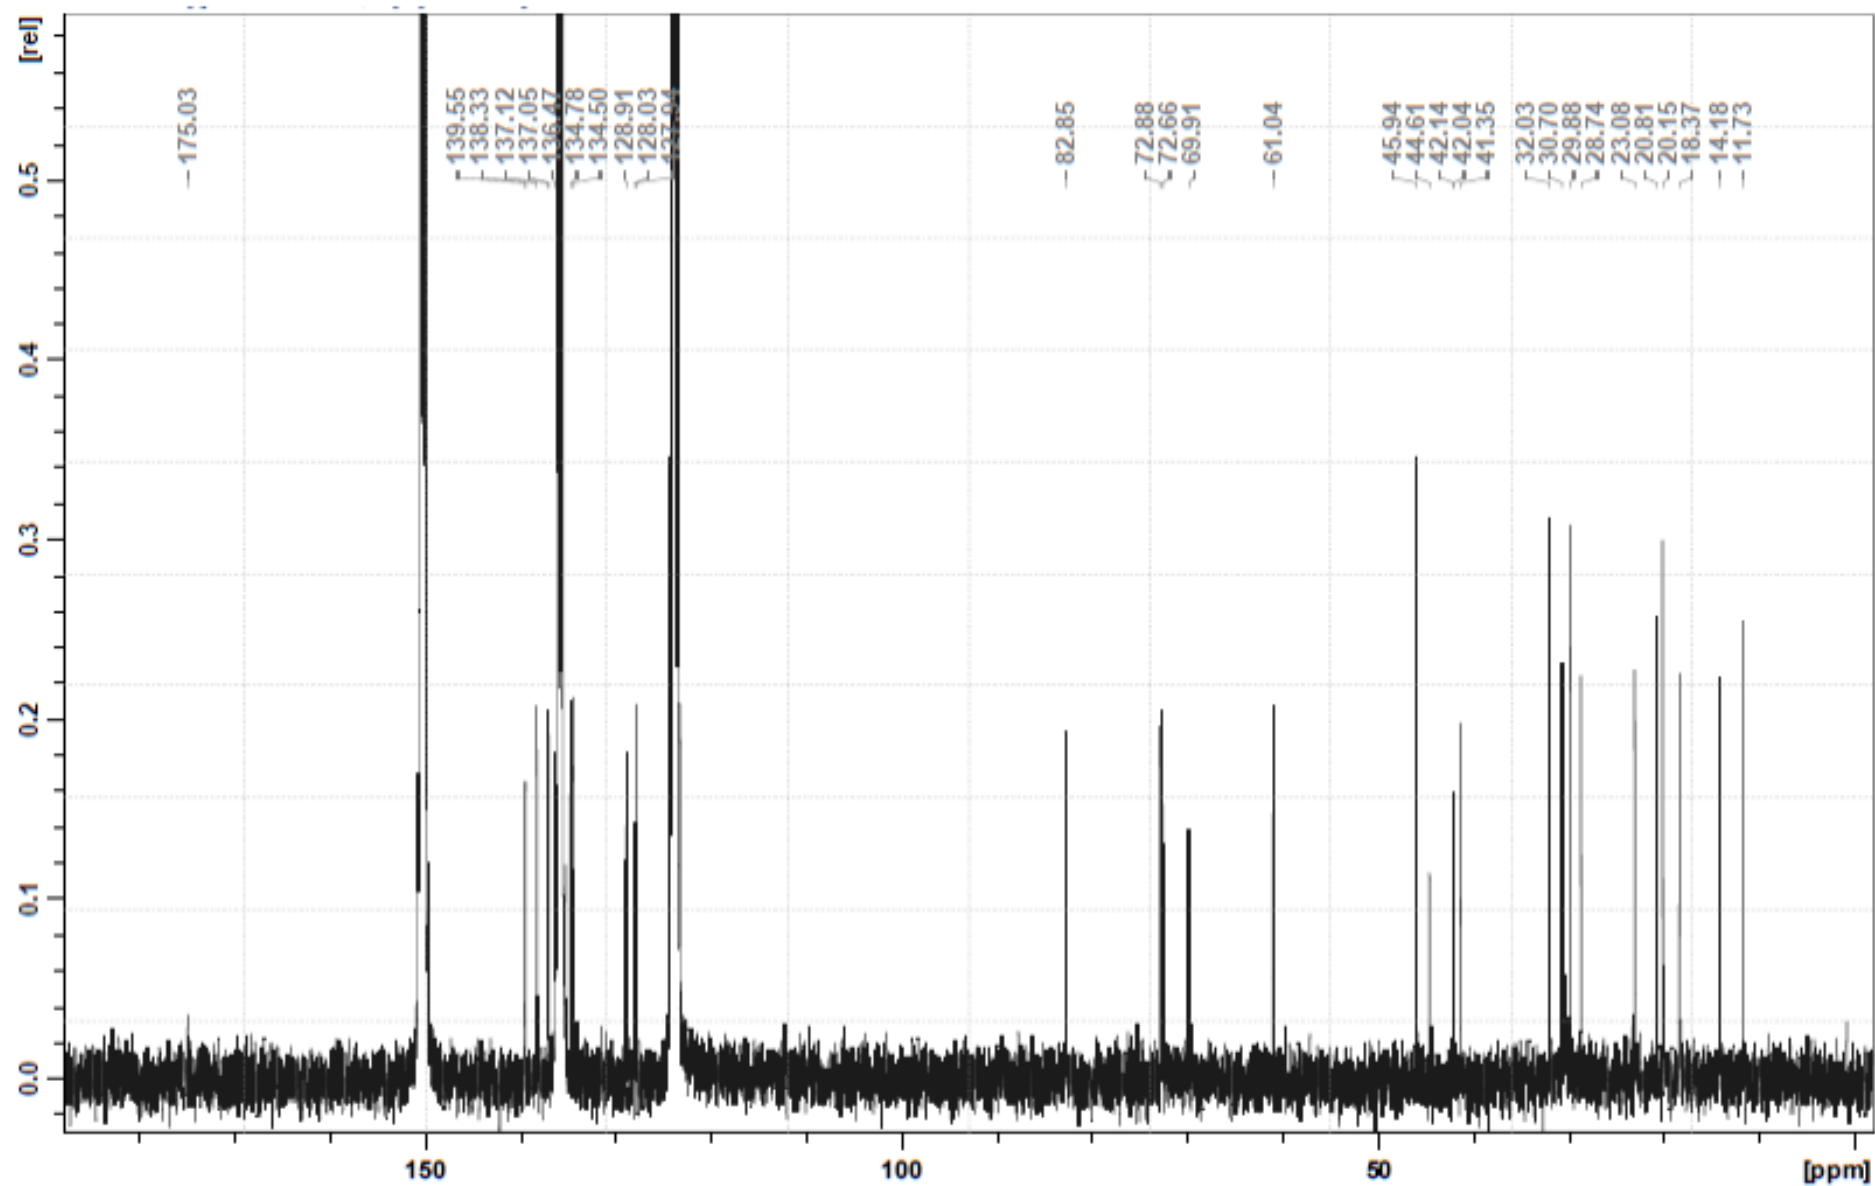

**Figure S14:** Chemical structure of compound **2**

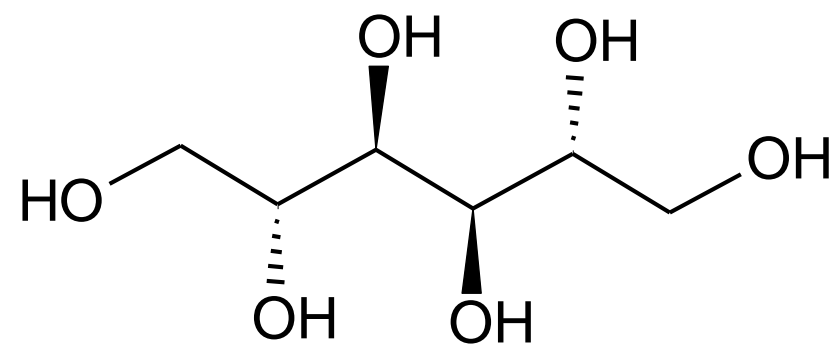

Mannitol



**Figure S15:** HR-ESI-MS spectrum of compound **2**

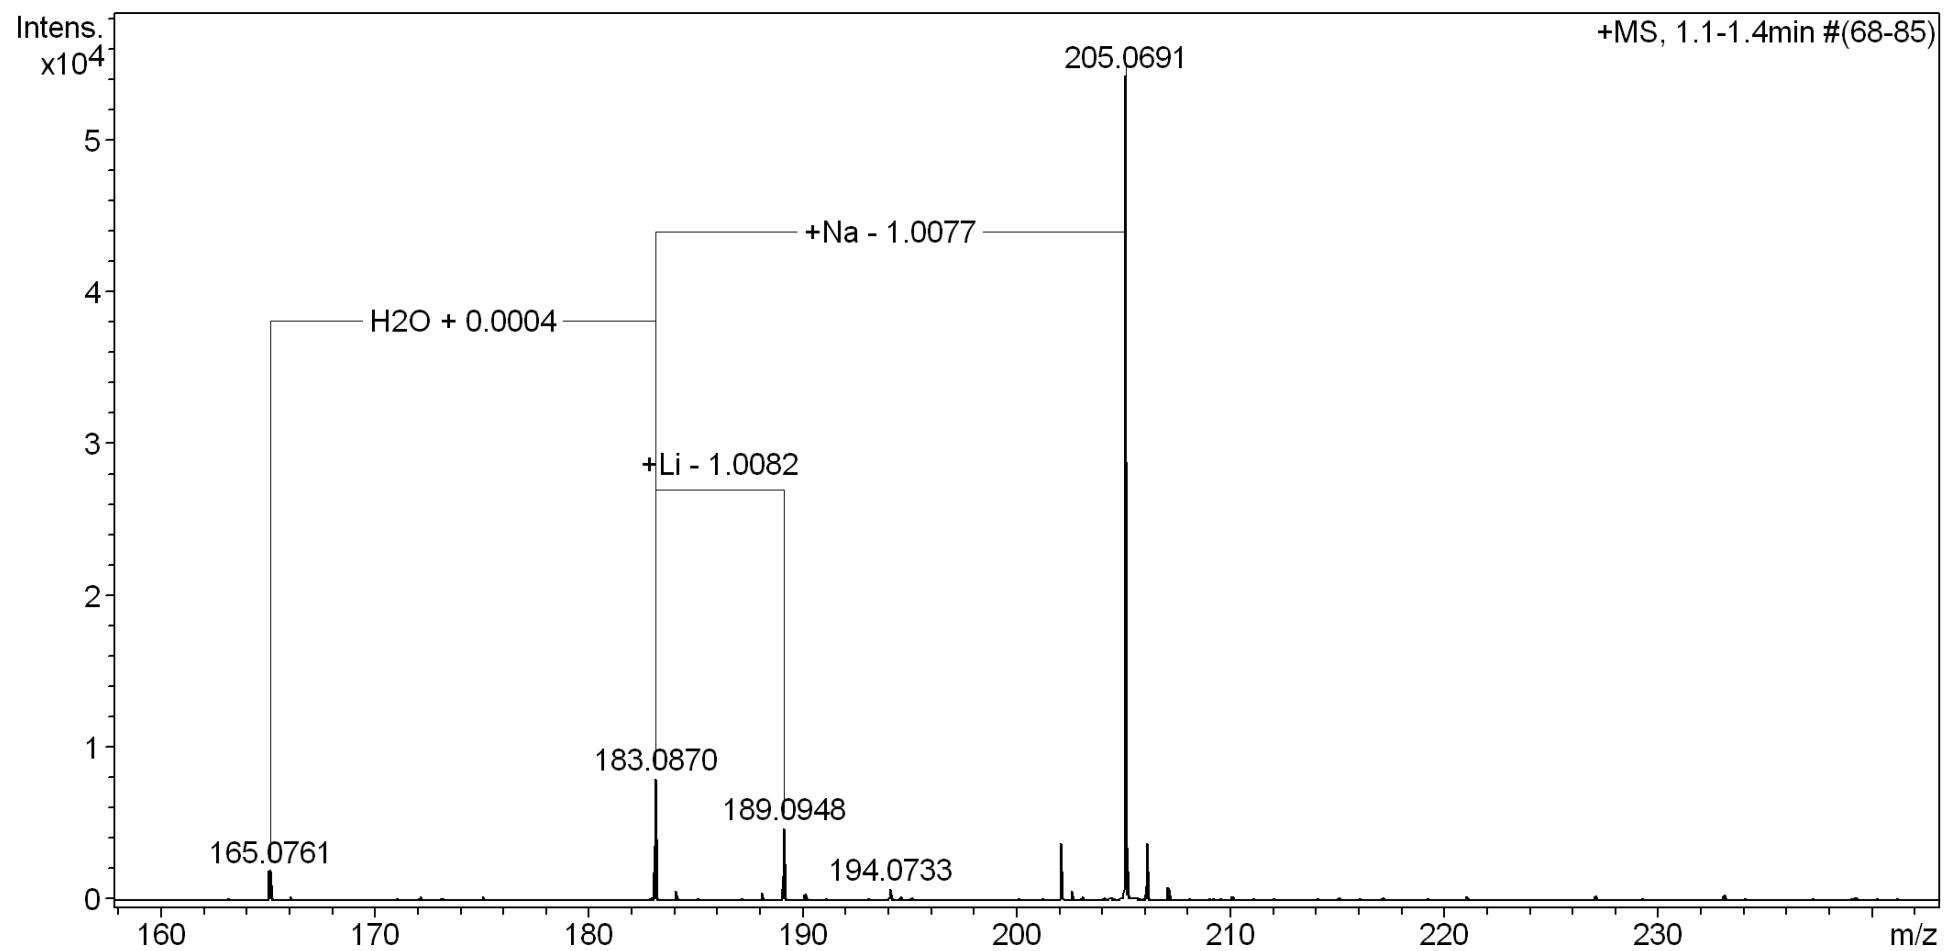

**Figure S16:**  $^1\text{H}$ -NMR spectrum of compound **2** in  $\text{DMSO } d_6$  (400 MHz)

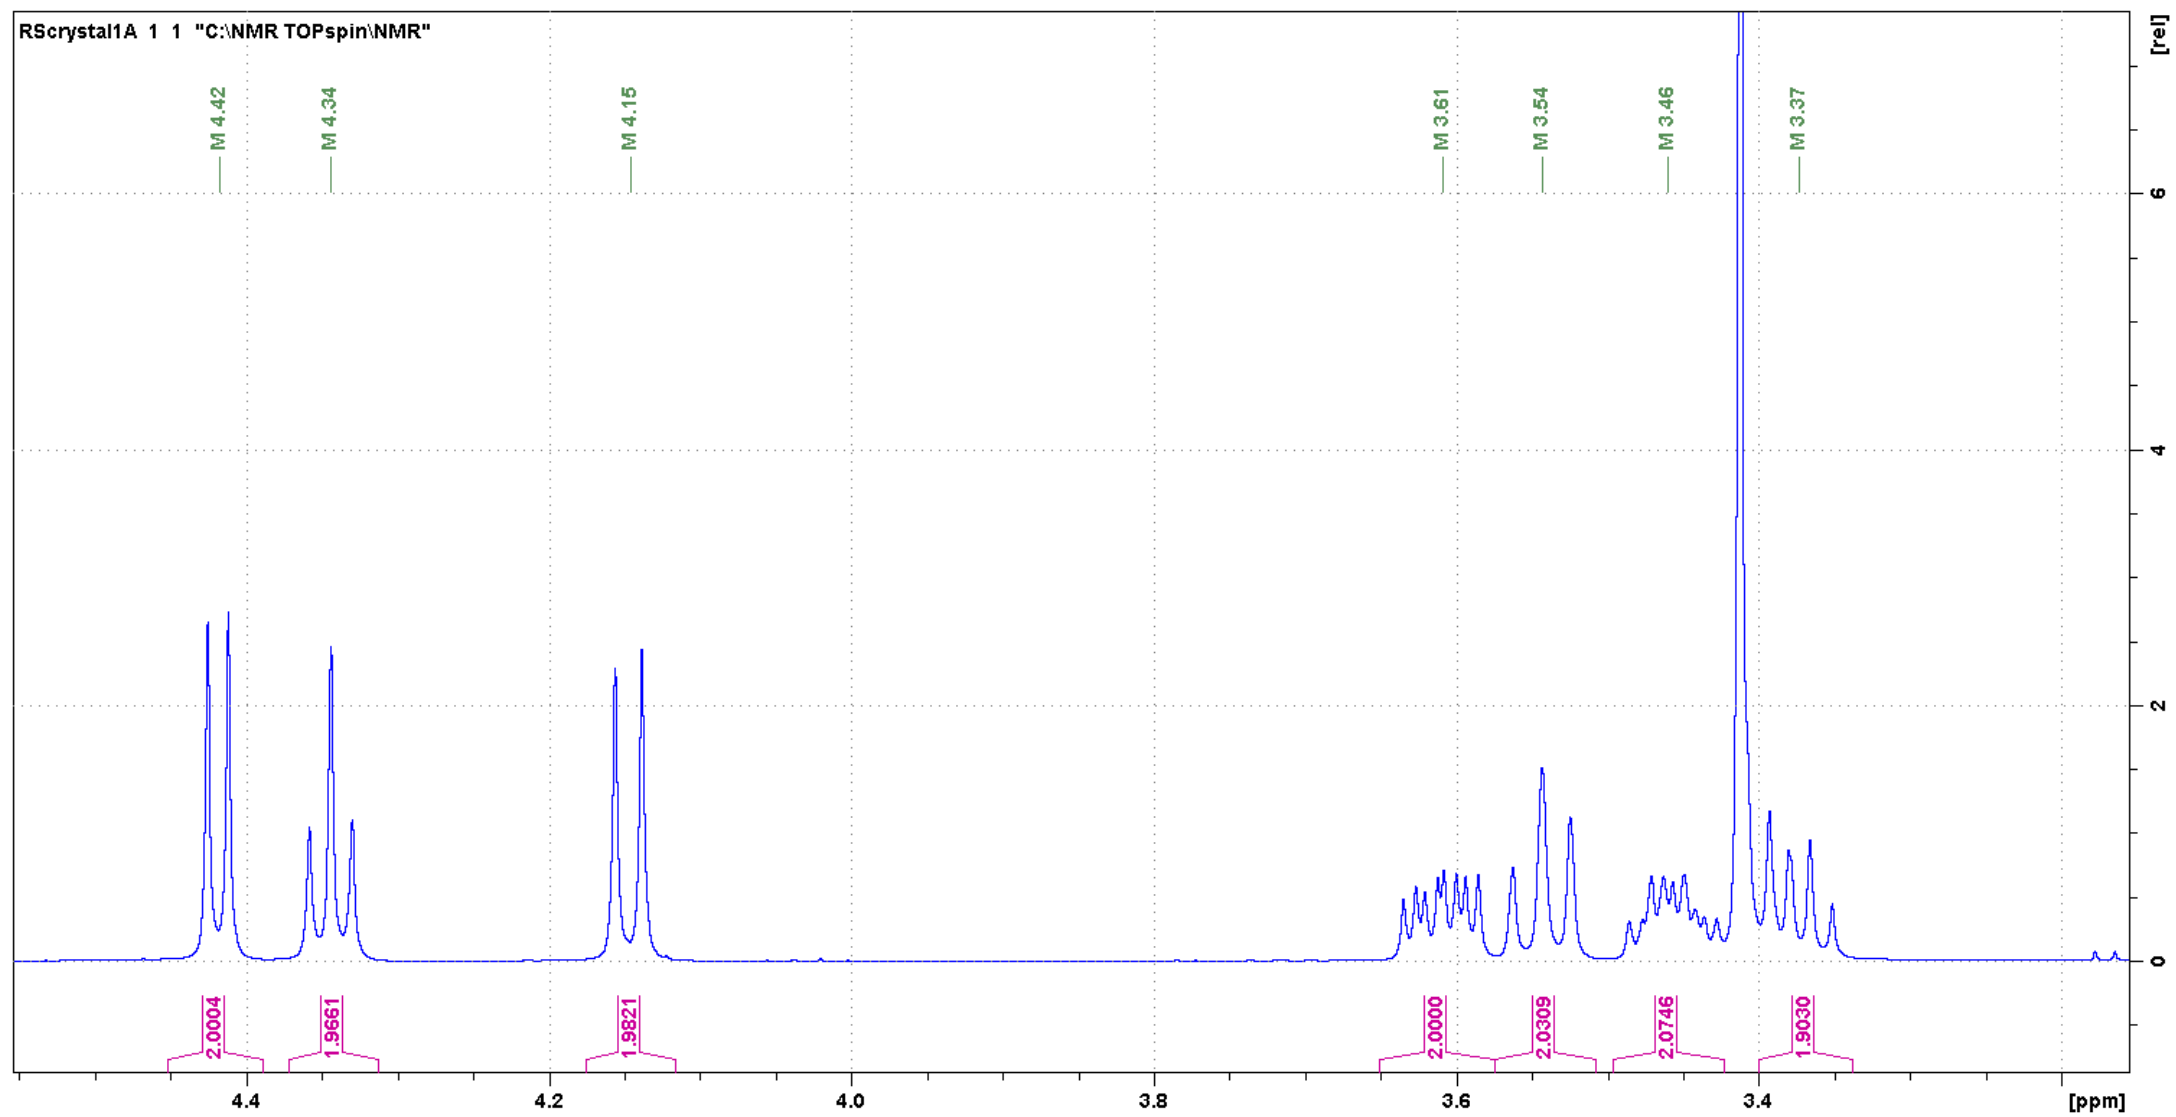

**Figure S17:**  $^{13}\text{C}$ -NMR spectrum of compound **2** in DMSO  $d_6$  (100 MHz)

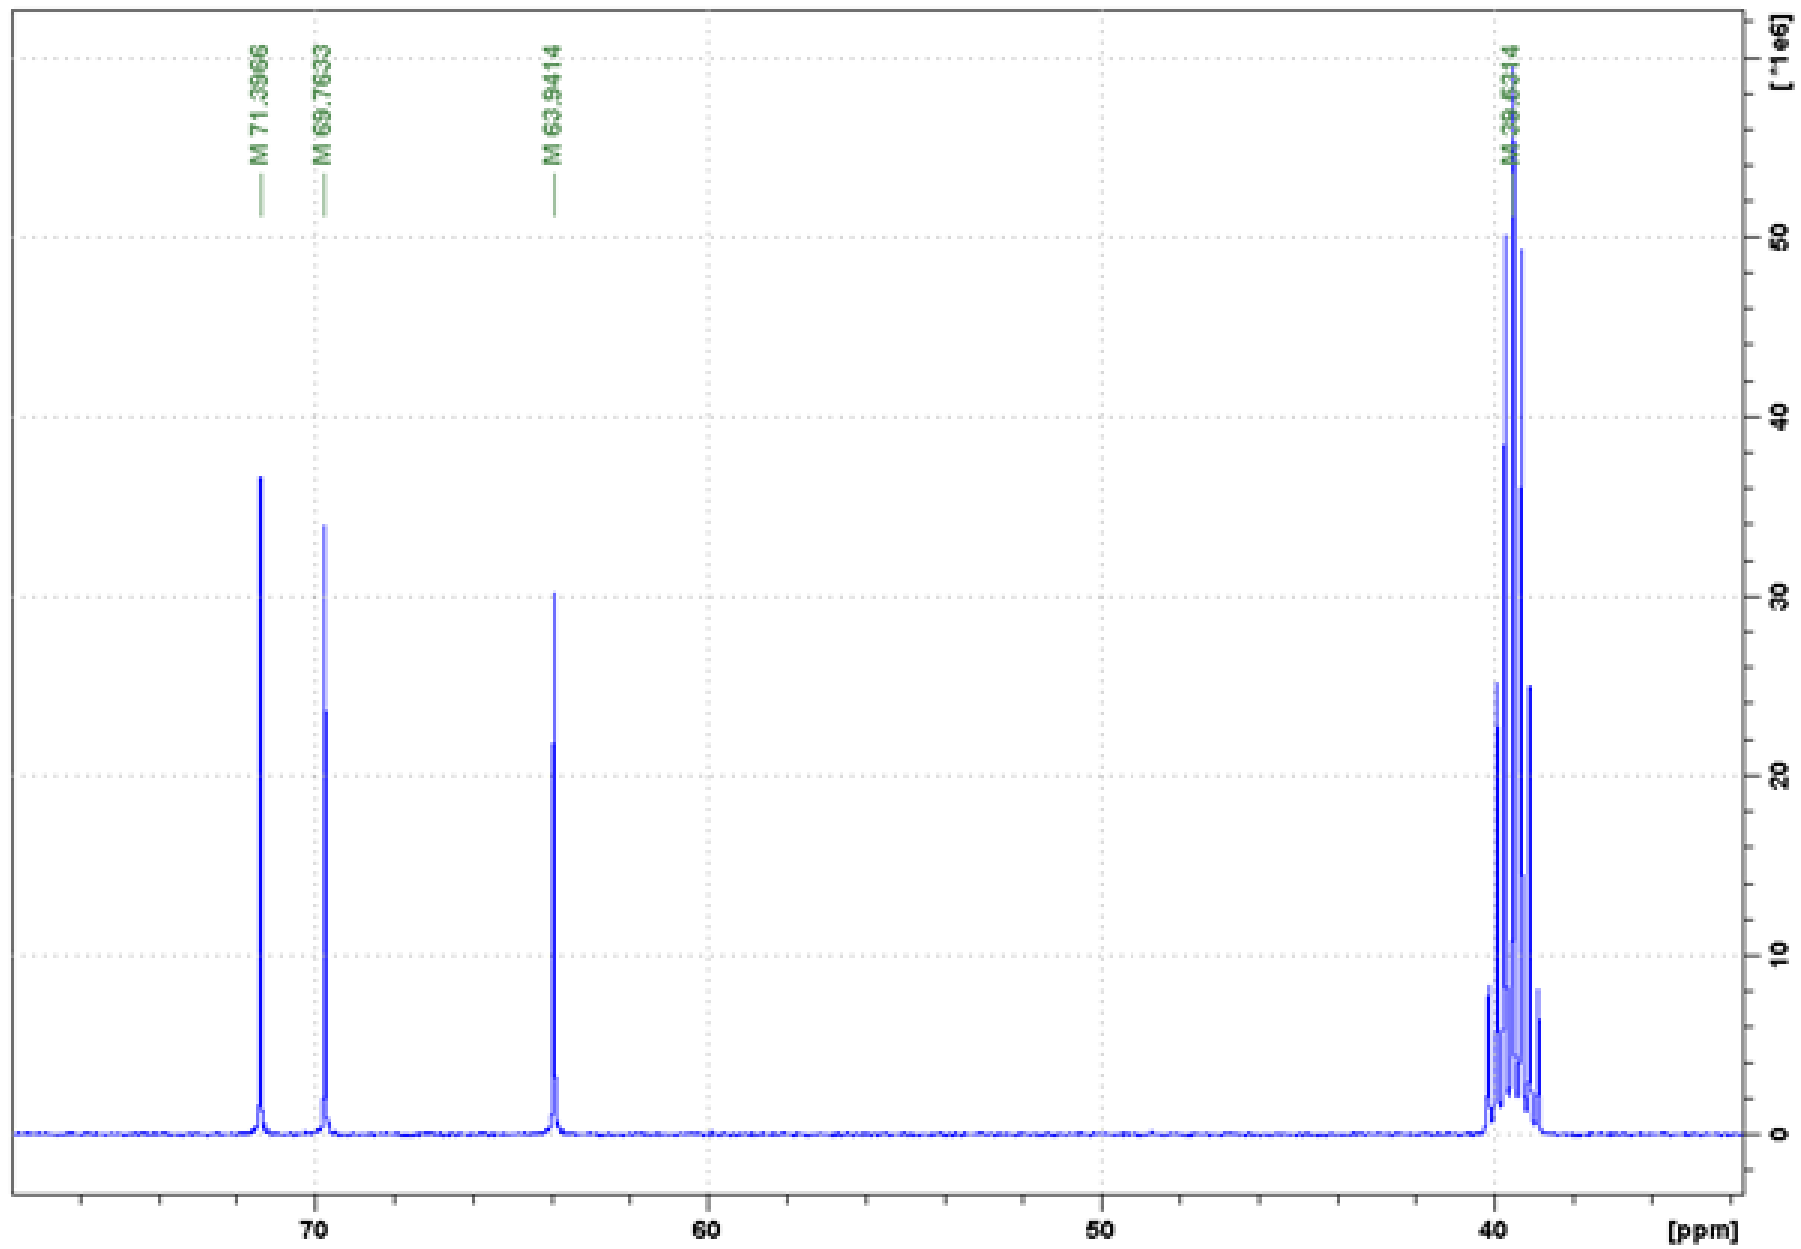

**Figure S18:**  $^1\text{H}$ - $^1\text{H}$  COSY spectrum of compound **2**

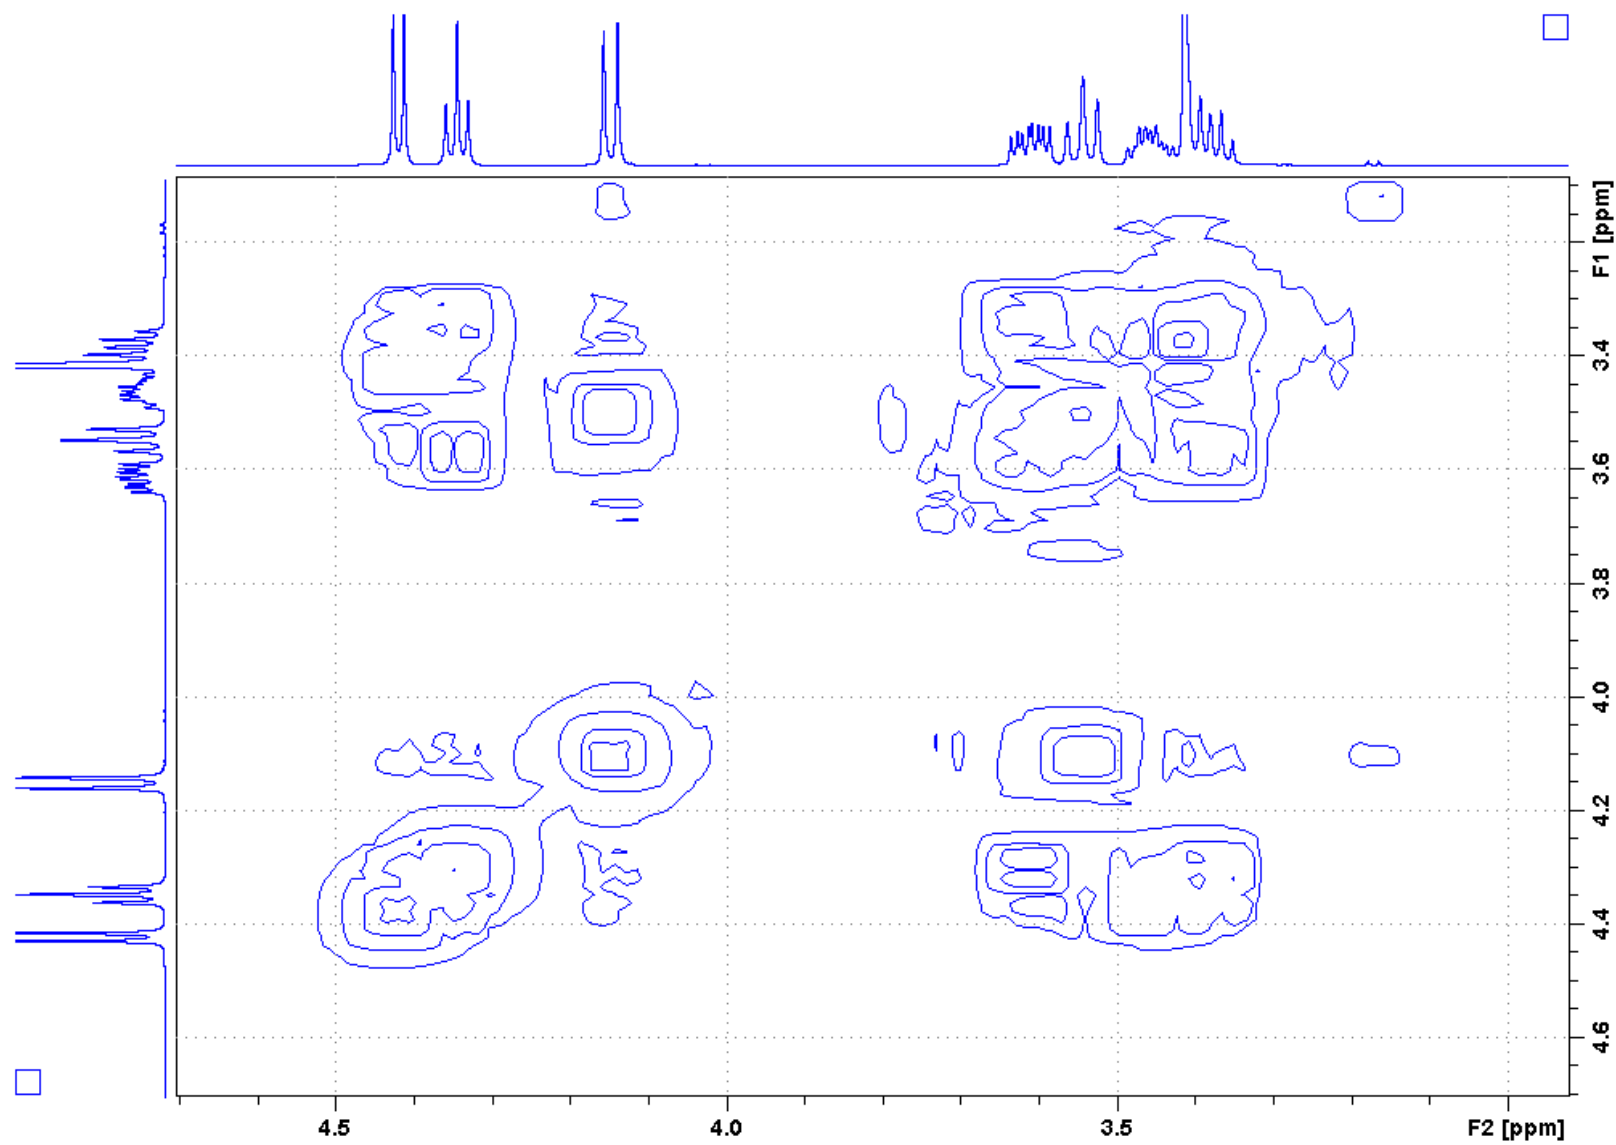

**Figure S19:** HSQC spectrum of compound **2**

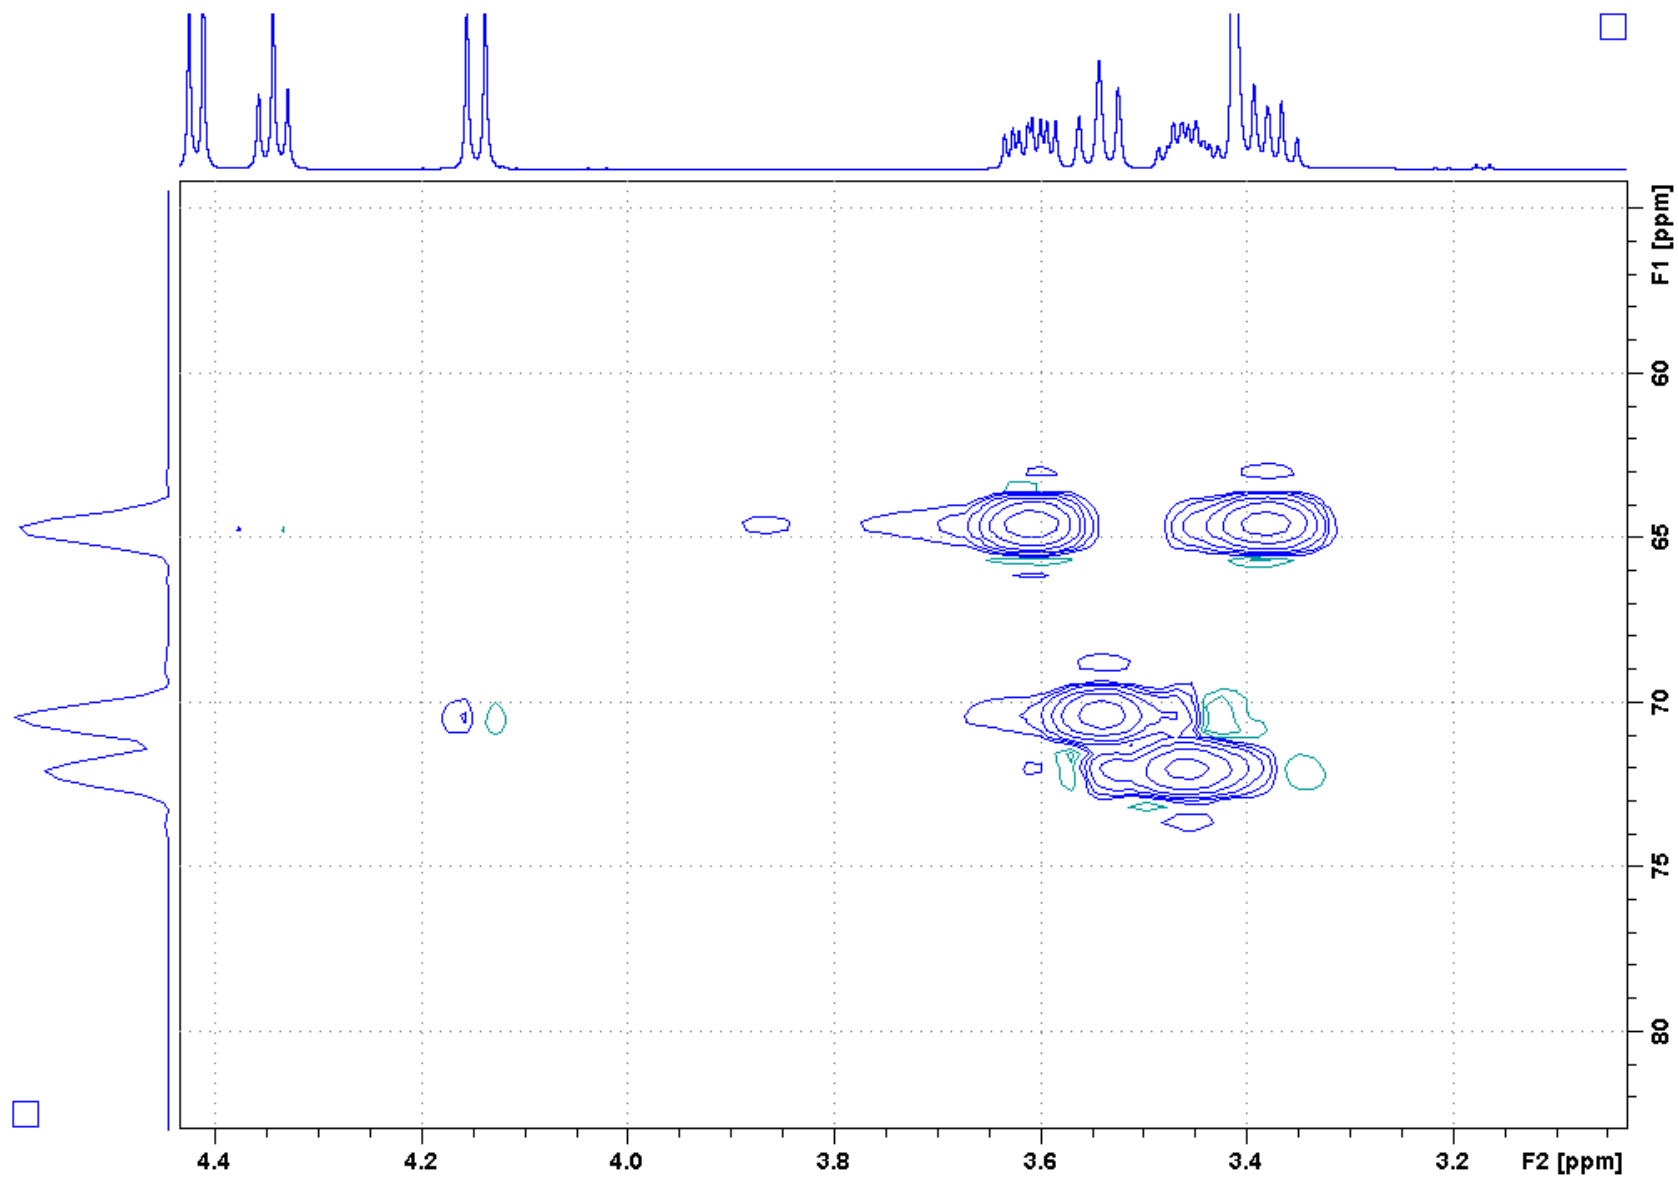

Figure S20: HMBC spectrum of compound 2

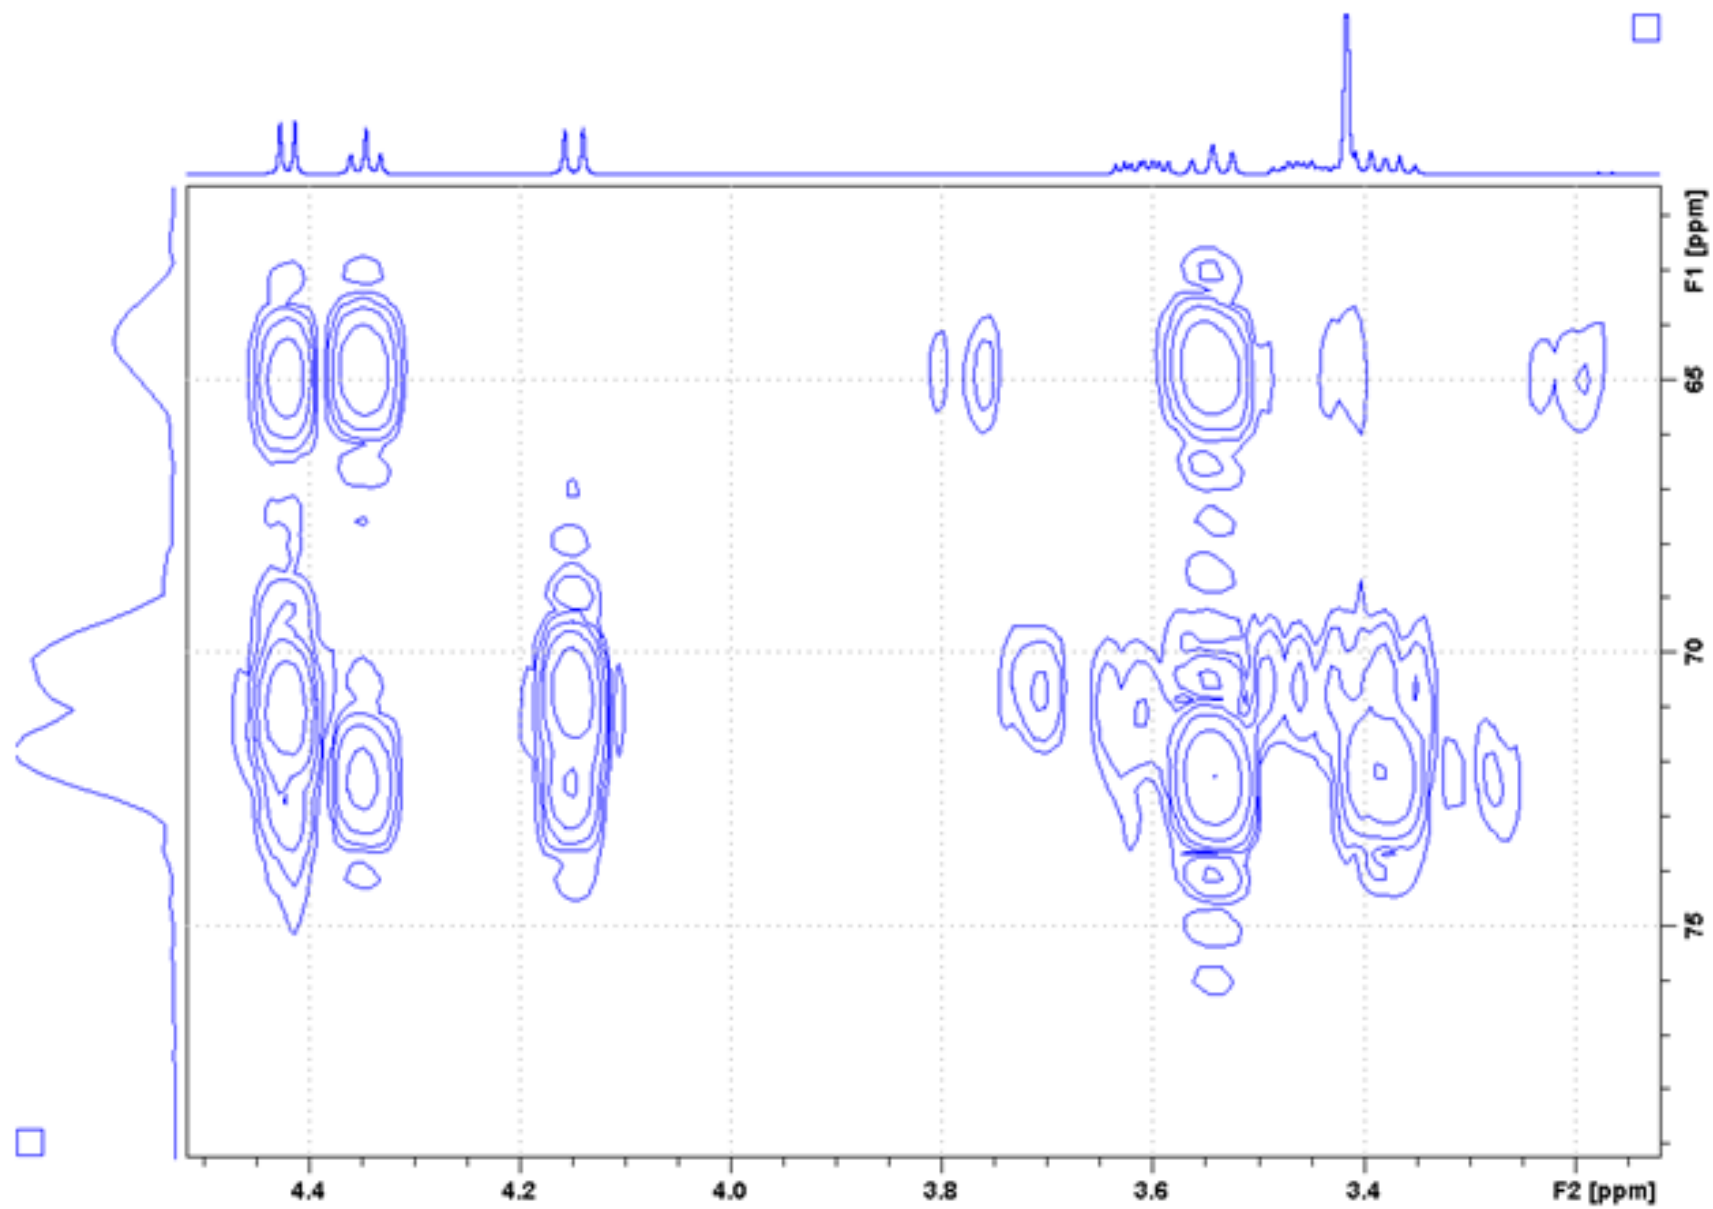

Supplement: microorganisms-08-01353-s001.pdf [file microorganisms-08-01353-s001.pdf]
